# Supplementary material for: Identification of Potential Biomarkers Associated With Immune Infiltration in Papillary Renal Cell Carcinoma
Source: Research Square preprint supplement (doi:10.21203/rs.3.rs-769170/v1), 2021-08-07
Supplement: Supplementary file 1 [file 807a34b771fb5ac6359734ef.csv]

	baseMean	log2FoldChange	lfcSE	stat	pvalue	padj
FGG	33.0954013750589	-2.50970089031568	0.483350494076734	-5.1923002481037	2.07711673092538e-07	4.05438529264641e-06
SLC7A13	6.63125967557342	-2.11847622143278	0.476263941928512	-4.44811381868327	8.66276259284734e-06	0.000101365200888149
TDGF3	3.28436875912154	-1.95407547638982	0.502448405627717	-3.88910673116489	0.000100613865588223	0.000798188417155432
CMA1	8.65873134488833	-1.91761367110665	0.351290254146976	-5.45877276260657	4.79436892177047e-08	1.10664286037842e-06
TDGF1	22.6345172356018	-1.89480809930394	0.425250319052341	-4.4557476253668	8.36013349524074e-06	9.82787539174914e-05
CAMKV	9.29402785385007	-1.76876430640333	0.330050994752687	-5.35906370386398	8.3654356270097e-08	1.80611795537292e-06
REG1A	807.288094410459	-1.68361960086011	0.384000288230518	-4.38442275295747	1.16293739304658e-05	0.00012973310401069
DNASE2B	19.9038191225318	-1.62373743715749	0.242244986333983	-6.70287324303523	2.04360730461049e-11	1.1236032211436e-09
PKD2L1	51.020699990432	-1.5926039853566	0.26725855962792	-5.95903827205323	2.53726677533035e-09	8.30309999823447e-08
NEU4	20.3758470592309	-1.53329702999316	0.279928724575131	-5.47745513548267	4.31486358865252e-08	1.01718169072576e-06
AGR3	57.8419780522681	-1.53186015958662	0.434770048463979	-3.52338015233248	0.000426079746020873	0.002632001334108
CCL24	1.35827070725079	-1.47088202884326	0.415842585436885	-3.5371125525731	0.000404527234402316	0.00252619053187252
MMP8	1.49698623624239	-1.45986672318209	0.390530739391616	-3.73816085631652	0.000185371335398016	0.00134335412275337
GPR150	1.84872887531704	-1.45501588262103	0.310866605753544	-4.6805152296563	2.86154851939402e-06	3.92719806103502e-05
UOX	1.79754433934159	-1.4073250265988	0.260308129831335	-5.40638138159829	6.43107837744074e-08	1.42497886851328e-06
GPR112	2.21411021029899	-1.38883968801903	0.428741333169452	-3.23934172092085	0.00119805940770159	0.00618200051120631
CCL18	1532.62770272919	-1.38306305211117	0.292695111838595	-4.72526870511541	2.2981127309155e-06	3.26239276229056e-05
KLHL1	1.21405578753983	-1.36373654779755	0.454860939569881	-2.9981394953084	0.0027163331112098	0.0118769971353071
DMRTC1	2.11833976298622	-1.35775066921691	0.530057685551756	-2.56151491851981	0.0104216765243101	0.0345904314185201
REG1B	9.58995091116134	-1.35468529104968	0.513287845458887	-2.63923118974028	0.00830942926538956	0.0290215300284981
SOSTDC1	3750.54238213192	-1.35366770166544	0.31445714221079	-4.30477645426809	1.67154437571666e-05	0.00017741619680868
ITGAD	91.1200985669444	-1.35214641198358	0.297251277860783	-4.54883296621808	5.39442382217003e-06	6.71609559407161e-05
CTSG	52.656481739879	-1.34414388412536	0.263354764349979	-5.10392848765435	3.3267403043901e-07	6.14787164393762e-06
FGB	385.280763064644	-1.32965758083919	0.425516779033383	-3.12480646206168	0.00177922079522343	0.00846073729751156
SLAMF9	3.93696923791726	-1.31016832640907	0.328995607861363	-3.98232771229326	6.82435925065006e-05	0.000578909708545801
UGT2B11	15.6577543880952	-1.28918311343053	0.273156082202005	-4.71958414045913	2.36327279538472e-06	3.33116095298496e-05
DAPL1	10.3308421806908	-1.26447525215075	0.352936610961844	-3.5827262258362	0.000340026922177155	0.00218744063598269
KCNH7	5.17480759304442	-1.26431197273334	0.290925465283427	-4.34582779304525	1.38751395816408e-05	0.000150902696716354
ALK	13.110052734878	-1.25396153980097	0.274190605849825	-4.57332057717458	4.80054779569183e-06	6.12021619898121e-05
PCGEM1	6.50563830897223	-1.23915752438679	0.489342095061981	-2.53229292327658	0.0113319281058893	0.0369398739065853
HAR1B	2.82570915529615	-1.23800405797014	0.295890212280199	-4.18399800530672	2.86426623929151e-05	0.000277553199235998
CHRNA1	63.8445924129034	-1.22601338707251	0.279264098001744	-4.39015754565362	1.13268566543396e-05	0.000127159587957152
REG3A	3.03353468495732	-1.22509228176862	0.467034421218137	-2.62313060046686	0.00871258677252937	0.0301323766792069
SCN2B	23.9566117913787	-1.22464260992279	0.353296404804123	-3.46633193338541	0.000527611474931271	0.00314188817766001
HS3ST2	546.074745791067	-1.20384587012734	0.288817221408424	-4.16819282540273	3.07024158625691e-05	0.000293338138386899
C13orf35	0.817011489252138	-1.2022252305994	0.330587114783241	-3.63663668920572	0.000276221094320779	0.00185516625715291
LRFN5	93.4966857450525	-1.19027121564606	0.338551067687201	-3.51578042207149	0.000438463449659879	0.00268972866000641
SORCS1	50.9957978117323	-1.18231273522531	0.373397347535109	-3.16636618612868	0.00154356346046888	0.00755731402216292
UPP2	46.062270140844	-1.16409388077013	0.209964520541397	-5.54424089254932	2.95232156442091e-08	7.31019594077031e-07
CTRB2	1.20823027624618	-1.16212201438743	0.367558770921995	-3.16173114702809	0.00156834290959515	0.00765957044730275
MMP9	532.328887660727	-1.14645285151092	0.252023774725418	-4.54898690712808	5.39047963864929e-06	6.71590791855362e-05
MEP1A	2.37376950563114	-1.13555327348279	0.292423885130622	-3.88324391824406	0.000103072077708535	0.000815001368357262
SCN10A	1.74379456083601	-1.13520141510632	0.327722482296724	-3.46391070624961	0.000532383201612102	0.00316319651976302
GRIA4	92.9724835136247	-1.12231139007501	0.342552402586811	-3.27632029902516	0.00105169215538128	0.00553153830031796
SRL	90.5041255131557	-1.1187939487079	0.222761200453087	-5.02239145072086	5.10320399823705e-07	8.93641182836684e-06
CD5L	27.125453480684	-1.10905056187853	0.340445932413272	-3.2576408066237	0.00112342508026732	0.005846301475912
TDRD1	24.8749877141885	-1.10267092722037	0.367477751893327	-3.00064676443448	0.00269406889778314	0.0117971297962782
FCGR2B	394.119518851975	-1.09010627786209	0.186038665313519	-5.85956836459242	4.64071809962095e-09	1.40683687047413e-07
ALOX15B	204.80547270193	-1.08368555175478	0.248373277885847	-4.36313262432703	1.28213162608156e-05	0.000140637288154572
HTRA4	46.3099427371958	-1.06928475907781	0.221127086774008	-4.83561184058204	1.32736717244995e-06	2.06108155751769e-05
RFX4	1.1064155757969	-1.06868020584668	0.296533920990445	-3.60390542261475	0.000313471162697015	0.002050397361442
CFD	613.870377030193	-1.0672694401899	0.199368237850507	-5.3532571270965	8.63849582910783e-08	1.85827375648269e-06
OTOA	73.2428488805211	-1.05591061822491	0.203093508500109	-5.19913524574494	2.00217809646681e-07	3.93413551829616e-06
FOLR2	290.459801899711	-1.05574761647873	0.178021558669068	-5.93044811185652	3.02109044481147e-09	9.72461549726223e-08
RD3	2.180780748208	-1.04128480031816	0.299305722665193	-3.47900063869797	0.000503287387313416	0.00302450777494797
CYSLTR2	411.093909719039	-1.01939362581693	0.299291364591936	-3.40602418384777	0.000659163399308639	0.00375964624762105
AKR1D1	6.12601756092307	-1.01614219669148	0.303185890185229	-3.35154843805784	0.000803609793467729	0.00443074051185072
PRKCG	10.551894578684	-1.01537738635201	0.374401269348566	-2.71200305522122	0.00668779764079587	0.0242239032349892
CTSK	695.113274246294	-1.01274949227988	0.193860718185242	-5.22410884350564	1.7499582707651e-07	3.52059786654833e-06
SLC8A3	5.11216618486585	-1.0011659604614	0.20799181048224	-4.81348740674042	1.48318951883659e-06	2.25168948899873e-05
KCNN3	13.0909836643391	1.00113937827798	0.215479389484419	4.6461027232044	3.38264612611854e-06	4.53341158340671e-05
CCR10	21.4977365854704	1.00289062603077	0.167745799270196	5.97863332729644	2.25017405109503e-09	7.48817319559897e-08
C5	137.057053503205	1.00298419004286	0.151107392574458	6.63755871208379	3.18920946120175e-11	1.68040965181892e-09
HTRA3	57.4567516472467	1.00381623914498	0.170516631140165	5.88691104458803	3.93480357307818e-09	1.22213618346976e-07
LEFTY2	2.75828214982651	1.00409211022915	0.326460838822663	3.07568930426777	0.0021001656300948	0.00966738106766553
TKTL1	3.64074332409795	1.00419938012261	0.260256840990716	3.85849369530474	0.000114088010309845	0.000888220815534518
SIX4	47.419059337037	1.00433318389865	0.164766117222435	6.09550798932034	1.09090463665374e-09	3.90169205804401e-08
VCX	0.797884574810565	1.00591832788547	0.357332914795017	2.815073244687	0.00487661179109672	0.018949854071461
KRT83	1.46414190433336	1.00656695761396	0.387474574024406	2.59776260196769	0.00938333414581069	0.031909824763241
FAM69B	103.493856870462	1.00664806305619	0.168264234311537	5.98254327293584	2.1968012168903e-09	7.32432556380901e-08
LASS1	26.8750804860434	1.0088655112602	0.307026218419731	3.28592625233392	0.00101647619004559	0.00537666401809592
POU2AF1	54.082147433743	1.00917167066072	0.291501257914585	3.46198050011992	0.000536216004298787	0.00318077792095778
ADAM19	87.8341825079283	1.0095135708792	0.166711451826752	6.05545425834512	1.40021959987141e-09	4.88944532467919e-08
GUCA1C	2.33928666877828	1.01084915286973	0.349315918649524	2.89379641436822	0.00380614854390224	0.0155576668686562
STAB2	1.12951252910755	1.0110892255133	0.30596123509983	3.30463179488537	0.00095101250226834	0.00508048441163509
HAPLN3	73.4556396257181	1.01112457020531	0.159420905267544	6.34248418366725	2.26089427598995e-10	9.64502946075328e-09
COL5A2	408.792765654803	1.01158121171832	0.17462362210184	5.7929230853336	6.91717910734827e-09	1.99774451739794e-07
SRD5A2	2.50411587591268	1.01177303302732	0.321698024077976	3.1451017951608	0.00166029048455873	0.00801794400944563
AIM1L	14.7933714445764	1.01201070247142	0.20470188319992	4.94382702616883	7.66036777347115e-07	1.26392498659397e-05
ALX1	5.9651736397141	1.01239679521395	0.294208980211872	3.4410805356277	0.000579396052339492	0.00339236960377235
ANO1	172.463417130549	1.01272193907325	0.183851281109849	5.50837575327069	3.62159717911411e-08	8.69969558467248e-07
PTPN5	1.80470791613837	1.01303527822021	0.246282525629835	4.11330554463622	3.90033598130678e-05	0.000358895780733135
CXADRP3	1.02380942872436	1.0133679411155	0.344305472700584	2.943223449709	0.00324813881602152	0.0137318643450493
CLDN19	70.5169542951496	1.01386390180477	0.344651836533608	2.94170462575182	0.00326411107939484	0.0137852630127878
ODZ4	156.832714673654	1.01452661072907	0.195778009633636	5.182025359373	2.19489363724509e-07	4.26078913966964e-06
NGF	14.5582553514101	1.0145492948889	0.17938250521032	5.65578730043585	1.55133490124407e-08	4.09311968578615e-07
SFTPB	4.3999396956354	1.01456087154591	0.418174651722855	2.42616540090602	0.0152593140171837	0.0466179284487005
TBX4	2.09290974752671	1.01518861285085	0.347179752891843	2.92410085667384	0.00345452797708907	0.0144583837603747
NKD1	4.99859859099271	1.01658960062588	0.209298559216634	4.8571266062738	1.19101445785714e-06	1.8843360108939e-05
GPR61	1.54026240640051	1.01732648262854	0.283547557807935	3.58785133080794	0.000333414301179798	0.00215586807453877
DKK2	7.05076650648002	1.01769917709605	0.212420890393958	4.79095617765567	1.659883803527e-06	2.46320689198285e-05
TP53AIP1	3.29642560791409	1.0181951648891	0.304204789717518	3.34707144432074	0.000816701588479515	0.00449217320604737
ANO4	92.8188921014255	1.01822262398054	0.261358663486356	3.89588242608112	9.78418466682811e-05	0.000782170475000168
CXXC4	1.1637840582341	1.018531444873	0.316805605933702	3.21500448791348	0.00130442482849652	0.00660192600448898
LGI2	42.7420701181783	1.01868928243931	0.192818811809446	5.28314261912388	1.26986455209798e-07	2.64179577324825e-06
ALDH1L2	50.914808054307	1.02011861467512	0.191037671643416	5.33988195050469	9.3007123571114e-08	1.98146584320457e-06
C8G	11.3579307153953	1.02074014596339	0.205017809517948	4.97878768855947	6.39837829744886e-07	1.07677651500033e-05
MTHFD2	317.780262934297	1.02329599229268	0.13912888000387	7.35502213677144	1.90895478834367e-13	1.61703997956155e-11
C1orf187	1.1869669406216	1.02339740843136	0.308504954956862	3.31728029643629	0.000908983743344662	0.00489711533177881
GPR174	5.82933270618643	1.02348693953518	0.212664106913775	4.8126924396798	1.48910366943698e-06	2.25427074886225e-05
CACNA1H	273.156118260863	1.02419101627345	0.200580159715406	5.10614318847202	3.28800578061728e-07	6.0826389070061e-06
ENTPD3	5.94600753930301	1.02420021188792	0.223689409404881	4.57867100017283	4.67939531987178e-06	5.98583921553541e-05
VTN	23.1262750611776	1.02634692018302	0.25843678489876	3.97136545629555	7.1461855686531e-05	0.000601598047110958
RNF165	22.240602438693	1.02682895058908	0.204067678441914	5.03180591080891	4.85881036575449e-07	8.63658420836521e-06
HOXB13	79.5166006943417	1.02710802021751	0.418241212821615	2.4557790785089	0.0140579550240238	0.0438334577340177
KLRC3	1.86819232351452	1.0273057826878	0.274063539430929	3.74842193463938	0.000177950707253801	0.00129915023555517
TPSG1	5.01724692491477	1.0278395957718	0.277327843298571	3.70622575629821	0.000210370797223164	0.00148738202637336
CDK1	126.895685549046	1.02858891540838	0.143139718238969	7.18590848202717	6.67617545390942e-13	5.11666710978408e-11
MYOCD	6.90823047571673	1.02869781610282	0.257225684268134	3.99920334172577	6.35560576673218e-05	0.000544889319584632
ZMAT4	9.56873142773024	1.02913759025054	0.420100704556139	2.44974021487987	0.0142959316501445	0.0443171377927086
WNT5B	132.731248628249	1.0298046277444	0.197797065479792	5.20636959525374	1.92570911275793e-07	3.80517088733884e-06
GSG1	50.9783685496803	1.02999570110469	0.311580178125783	3.30571638831557	0.000947339234290838	0.00506544663361069
DNAH5	213.149715334306	1.0302038379965	0.176930945310814	5.82263230542709	5.79279083664333e-09	1.69793988364128e-07
CYP4F22	3.36794728306549	1.03034438071475	0.231898611083686	4.44308129272463	8.86796405290338e-06	0.000103084987257125
GPR4	90.6949389060552	1.03222055041393	0.157068600046203	6.57178169354213	4.97167201434516e-11	2.47242925117884e-09
GPR176	64.3958600532504	1.03325534718227	0.1839921702845	5.61575715740831	1.95703357710755e-08	5.01408429075429e-07
SLC19A3	180.701671005841	1.03341082215914	0.2091266950342	4.94155383649198	7.75024090105109e-07	1.27756298800939e-05
PTCHD2	4.89049490102587	1.03566769513346	0.207673474638831	4.98700037130215	6.13239475297023e-07	1.0389274325989e-05
PBK	46.9939028915684	1.03585323497506	0.174849751391485	5.92424768540735	3.13730297570667e-09	1.00077138525966e-07
CHRNA5	32.4914412278358	1.03691547029934	0.172168414014818	6.02268119987503	1.71551140381082e-09	5.87454814179241e-08
CXorf48	0.697903251730691	1.03740216742737	0.324066429942003	3.20120219676266	0.00136855460298496	0.0068462533741864
DRD1	0.796472135511963	1.03743584097658	0.353366756805889	2.9358614555428	0.00332622843346608	0.0139993704473016
SORCS3	5.43020220767192	1.03791690369871	0.382842362009645	2.71108165316502	0.00670641090371677	0.0242779153109965
LRRC7	1.70301677723798	1.04067038051275	0.397690234456267	2.61678635869845	0.00887618770713249	0.0305727679313373
SLC4A9	1.65745667711497	1.04149471316534	0.261335110648464	3.98528429869612	6.73993795022557e-05	0.000573265507104712
GLT25D2	34.4943926086153	1.04201483315256	0.202617941835326	5.14275697262503	2.70735748862855e-07	5.12083942079912e-06
SHISA3	141.4993446729	1.04217430808376	0.202326659007249	5.15094903062885	2.5917162287208e-07	4.9337359261584e-06
AVPR1A	5.64490066971365	1.04241461129278	0.253784653293524	4.10747694064519	4.00004698587252e-05	0.000366926589833612
CTNNA2	3.17940911042762	1.04276185280928	0.301306963280133	3.46079573288786	0.000538581309466765	0.00319027117555283
CASC5	21.3948997135579	1.04357729564407	0.179366638720647	5.818123721822	5.95118478388156e-09	1.74148389113784e-07
CEL	15.2202496408961	1.04424088708367	0.170825872405878	6.1128965558717	9.78387957046458e-10	3.54847358562962e-08
KIF18A	27.9125262928574	1.04477692405204	0.146596332955579	7.12689671690917	1.02657062804526e-12	7.51008528880716e-11
NHLRC4	24.2995638981734	1.04519024372856	0.178253980513001	5.86348894269055	4.53241043903051e-09	1.38109801054382e-07
NR5A2	20.4272743155921	1.04599320534453	0.148099516756449	7.06277257517775	1.63212732033894e-12	1.15580728317122e-10
CXCR5	9.64333125162477	1.04621397861791	0.210975993274632	4.95892429455721	7.08845814948657e-07	1.18167667682213e-05
LGALS12	22.384963204445	1.04623509625316	0.229093321561915	4.56685113786874	4.95105349539799e-06	6.26991781706194e-05
EFS	57.4034986896984	1.04626968928543	0.244893896914674	4.27233876575526	1.93433411053255e-05	0.000201443829958049
TNNT3	1.66372112510854	1.04744867206851	0.327977696811205	3.19365823424102	0.00140482324036921	0.00699409185812614
JAKMIP3	12.1593590776731	1.04797867273906	0.220890688753357	4.74433159067751	2.09195933296619e-06	3.01596482335778e-05
ZNF98	5.70603247467202	1.04889298379952	0.305239113316627	3.43629940607085	0.000589718869527205	0.00343886128659738
IGFBP2	649.376500230805	1.04956731927268	0.175199784293364	5.99068842182606	2.08954627239232e-09	6.99306752484566e-08
KLRC4	0.999165364241937	1.0496381627659	0.374028234942956	2.80630729101502	0.00501128773055197	0.0193584634478926
FOXG1	0.823070927900313	1.04978993640166	0.438225963392225	2.39554481956166	0.0165956851447172	0.049820015998856
IQGAP3	169.296768325314	1.05010416303089	0.153767275566853	6.82917843968914	8.54022943030152e-12	5.13853179128689e-10
EPHA3	48.4808698651492	1.0510280873816	0.25956959557665	4.04911863828532	5.14108795685907e-05	0.000455316764323327
BUB1B	61.7724073329304	1.05168589288783	0.145250672930549	7.24048895381493	4.4707000298833e-13	3.51774548129129e-11
SIM2	94.8154121852872	1.05223490598257	0.173851683979718	6.0524861301046	1.42627282449525e-09	4.96085149015008e-08
FOXS1	46.081794134232	1.05419972980899	0.169464470796816	6.22077137970089	4.94716579850109e-10	1.95501391287195e-08
KIAA1644	11.2361923431753	1.05523283898535	0.254694689205382	4.14312855237601	3.42599772588507e-05	0.000321600550048088
CD79B	50.3583802262932	1.05534062342169	0.174768745836921	6.03849743481274	1.55555900267855e-09	5.38935745272429e-08
DTL	92.1527204953178	1.05623633192305	0.15520879376539	6.80526087664614	1.00866287849779e-11	5.95245586697497e-10
MGC12916	3.88372521597124	1.05711064349297	0.221287111517534	4.77709992345943	1.77841412342655e-06	2.61070013608156e-05
RAPGEF4	40.5128978955163	1.05748989992944	0.187807752520346	5.63070419478492	1.79475314345179e-08	4.67269259583389e-07
PODXL	925.090516432105	1.05756627240327	0.14178523959187	7.45893067182086	8.72274863703455e-14	8.21423095053509e-12
PP14571	2.37440051699634	1.05766171898854	0.259377345505726	4.07769505438626	4.54843678706199e-05	0.000409799108794634
THY1	1413.78442662549	1.05776850600326	0.19779813089953	5.3477173985054	8.90703942052216e-08	1.91139667758696e-06
RAET1K	2.41769799527934	1.05782410791538	0.20322663301544	5.20514507483384	1.93845107278597e-07	3.82164117957716e-06
PI15	10.3030822506998	1.05855309149519	0.224809187228326	4.70867362916125	2.49333925666738e-06	3.4894923478292e-05
TMSB15A	3.56748627843395	1.05879130124942	0.196668565770653	5.38363259578623	7.29974282747891e-08	1.59548946935416e-06
CNKSR1	84.2918570060832	1.05961903167835	0.309889779500031	3.41934165556512	0.000627728551512501	0.00362050751557545
ODZ2	8.67633958904278	1.06091238935212	0.216907272499142	4.89108722417924	1.00280510265282e-06	1.61543781049731e-05
COL3A1	3875.66503237352	1.06097762331517	0.219120904417591	4.84197354942096	1.28555879839548e-06	2.01233713234249e-05
IL21R	32.3272498153017	1.06182749432987	0.189430751350495	5.60535967238613	2.07822941895053e-08	5.29395304073383e-07
C2orf48	2.18646034758471	1.06187880108924	0.233633134925157	4.54506935169708	5.49171693470038e-06	6.80849836218036e-05
CNR2	1.34400199174894	1.06241377252205	0.289916104226985	3.66455590783689	0.000247768115487442	0.00169821398241954
TRAT1	13.8622646415246	1.06330339600145	0.200829089955621	5.29456861173061	1.19297692512202e-07	2.49650868585819e-06
KIF11	104.838585775809	1.06370106916678	0.132059633479804	8.05470256987688	7.96723064167184e-16	1.16571777917486e-13
TNNC1	17.14027449899	1.06389370960221	0.231278878283995	4.60004699735626	4.22395632155778e-06	5.46644171906864e-05
PYCR1	501.891786054373	1.06407128281094	0.179954987796346	5.91298577406003	3.35961205670045e-09	1.06401738554248e-07
GCOM1	19.3003049816391	1.06440299452049	0.191582436985901	5.55584849669086	2.76266420819353e-08	6.92224375626778e-07
FLT4	205.28031693742	1.06456367826412	0.145344341138551	7.32442467264215	2.3992578314447e-13	1.9942000304177e-11
EHF	132.765548320709	1.06504258745982	0.278595405038075	3.82290076648702	0.000131890868319434	0.00100950969854184
TMEM84	4.19962306071452	1.06547593352064	0.291529797762413	3.65477540100022	0.000257407220634098	0.0017530304631285
CDC20	120.123045226797	1.06737027509337	0.15051387893685	7.0915073256547	1.3265905528165e-12	9.61294710215729e-11
PRR16	7.46878887395363	1.06767710119086	0.208708584658257	5.11563577003358	3.12685932954636e-07	5.80271672644536e-06
BAGE2	3.34467737619986	1.06921878293316	0.244219154497056	4.37811188534785	1.19711893572177e-05	0.000132793193220665
FAM162B	4.55297005800684	1.0699041708052	0.207464100111917	5.15705690877618	2.50861577461257e-07	4.79616994316857e-06
KRT15	38.2011662068438	1.0700706669569	0.279119779129775	3.83373285222964	0.000126213212023711	0.000971512480725122
CHAC1	43.5494855063963	1.07035579540492	0.166045843190854	6.44614628608706	1.14729929785594e-10	5.1927626957599e-09
ZNF521	31.543852061638	1.07043119649849	0.182154310006054	5.87650765146821	4.19012048465703e-09	1.28788008785361e-07
FAM129C	4.03147281447633	1.07108782697863	0.226818133782306	4.72223190058795	2.33270481090245e-06	3.29551312247484e-05
LPHN3	24.3426978002686	1.07141500816144	0.244098073844736	4.38928087913932	1.13726104060174e-05	0.000127430819384894
LHX6	20.9729077545981	1.07165995037862	0.151781513044857	7.0605433354845	1.65852811011248e-12	1.16982397057495e-10
KIFC1	87.8513114432031	1.07189954708555	0.142160015239102	7.54009167263172	4.69641193239213e-14	4.69368860188173e-12
HSD17B2	54.3026788488263	1.07220891765592	0.186838679284483	5.73868816543797	9.5412715286119e-09	2.68124874829437e-07
GTSE1	45.8665310264144	1.07245979107212	0.148400420792496	7.22679750734469	4.94516595618663e-13	3.83987798633018e-11
ADAMTS15	161.279783656178	1.07292590111997	0.227235759544005	4.7216419777988	2.33948233371812e-06	3.30025460048969e-05
COX4I2	13.3700558796431	1.07324752076575	0.17812934115472	6.02510239923666	1.69002589729881e-09	5.79849195460816e-08
GSC	2.13587459198456	1.07334032940897	0.253678016583996	4.2311129039184	2.32537906606448e-05	0.000234959377584756
INHBA	43.145768782789	1.07337524446375	0.219604800624872	4.887758561787	1.01990499565833e-06	1.63999982226476e-05
OLFML1	79.6475349601581	1.07474530454256	0.18612795225957	5.77422838157989	7.73065240292963e-09	2.20747532486236e-07
TUBAL3	15.0337938591183	1.07597030462378	0.369409711809674	2.91267465425528	0.00358347742458319	0.0148610644939847
HLA-DOB	61.1669024582589	1.0766233767154	0.193866069552609	5.55343892409825	2.80103561712277e-08	7.0041715488053e-07
UNC5B	405.074700820849	1.07733597311555	0.163558962714636	6.5868354459743	4.49299762870945e-11	2.27919856787026e-09
HIST1H2BH	2.69179524924881	1.07806557081808	0.239707036629913	4.49742980420937	6.87798582549523e-06	8.28916685191066e-05
FAM163A	2.89586241281158	1.07957058099684	0.222388608424185	4.85443291653528	1.20731729889906e-06	1.90402524091318e-05
SERPINA7	6.82107989649325	1.07965039621039	0.277492056092831	3.89074343753182	9.99375579143656e-05	0.000794474416396915
EBF1	61.74756471999	1.07969473795273	0.179017278195891	6.03123200639475	1.62714385940794e-09	5.60446593131484e-08
UGT1A4	1.58332956746056	1.08086673458234	0.413418240540115	2.61446309957256	0.00893678134329595	0.0307396108221705
OMD	8.40270851073951	1.08185889619035	0.320747226453018	3.37293297327644	0.00074372054569809	0.00415750822262046
P4HA3	26.3505641092329	1.08190351588523	0.230853059982977	4.6865461344329	2.77854208288332e-06	3.82811743465886e-05
KRTAP5-10	1.96138301347875	1.08190411863287	0.270762005158509	3.99577524918796	6.44828877046743e-05	0.000551500021219108
CRH	0.61451918689485	1.08277509871097	0.422826996222892	2.56079935383357	0.0104431650226236	0.0346487619116431
PLCB4	650.47897368465	1.08336525520474	0.215472600373269	5.02785622546903	4.959935198424e-07	8.79866660850686e-06
VIP	1.16625494416741	1.08345565748659	0.328053084666416	3.30268395003299	0.000957642545879253	0.0051081963339097
CACNA1G	2.68848784598456	1.08574463288353	0.243129561493144	4.46570390789004	7.98059203615899e-06	9.44529989749165e-05
TMOD1	221.584765287335	1.08580694161138	0.156659225869256	6.93101179063383	4.17841220096951e-12	2.74998548721057e-10
NRARP	86.9783016075585	1.08589036640768	0.14985971629696	7.24604579029028	4.2911508908198e-13	3.40675046507057e-11
XCL2	9.21908013770844	1.08595831155102	0.204271674987394	5.31624519952678	1.05930382338795e-07	2.22995420799766e-06
KIF26A	33.64573950062	1.08638739739714	0.177899456576411	6.10674938700851	1.01680706511403e-09	3.65885208958918e-08
ADAMTS5	201.230571702602	1.0867098574575	0.219096082469794	4.95996936689782	7.05042968110438e-07	1.17644493001199e-05
PLAC9	29.1052064785973	1.08783862048474	0.21450835725517	5.07131113400254	3.95084233508956e-07	7.18866523128732e-06
AURKB	53.1530346208668	1.08787140089712	0.163792800120929	6.64175348424311	3.0997309289104e-11	1.64304300495299e-09
ELF5	4.69954442544571	1.08848794908107	0.27666512005427	3.93431578533482	8.34340304058516e-05	0.000684078342118462
PSAT1	751.964234268776	1.08957430326288	0.214959425555107	5.06874402203666	4.00449347840059e-07	7.24903400220901e-06
LRCH2	45.0678369764602	1.08962326737301	0.243125214414254	4.48173699300655	7.40379530168862e-06	8.85055989338928e-05
RSPO3	18.8957975710239	1.09243103669431	0.265205514313963	4.11918673531442	3.80211938709268e-05	0.000351502462815085
STK32A	21.6438869132855	1.09268261877979	0.251838356853498	4.33882523866464	1.43246373530751e-05	0.000154730555032851
ZNF695	6.43404016978755	1.09291542298448	0.185763869295867	5.88335841155302	4.02024027872904e-09	1.24213497198288e-07
WNK3	11.6720462261002	1.09305198334569	0.20817077552149	5.2507465594413	1.5148398704011e-07	3.08261207650356e-06
ICOS	9.958949688706	1.09337711638332	0.201688469684309	5.42111860977833	5.92272447364702e-08	1.32688959804396e-06
DGKI	2.77379594220939	1.09384983372481	0.215935526928165	5.06563162294596	4.07048405049269e-07	7.35345404386965e-06
ASPHD2	65.625292542176	1.09468924201432	0.121208943871878	9.03142298782373	1.69453741817545e-19	5.26317376339969e-17
ADAMTS4	140.130553525679	1.09550547104171	0.210899707005861	5.19443808905464	2.05339090866717e-07	4.01693178420371e-06
GABRP	45.7269077920468	1.09612235155009	0.249709930817014	4.3895825366806	1.13568468445381e-05	0.000127334779313302
RHCG	30.9893013683341	1.09618589033921	0.372382908287349	2.9437062387765	0.00324307664259422	0.0137160604110101
TMEM158	29.2459296074221	1.0962000775001	0.184127079151032	5.95349734843147	2.62472110237004e-09	8.55765421664074e-08
IGFBPL1	2.45591939772983	1.09646376241134	0.448963382414382	2.44221200516378	0.0145975713889334	0.0449844045029899
B3GNT4	34.2706328573879	1.0965834423175	0.200710166824595	5.46351716839452	4.6679210107194e-08	1.08595103250691e-06
TPX2	222.021065247957	1.0982057307197	0.155087182008469	7.08121532996667	1.4289565924611e-12	1.02009062552142e-10
CSPG4	266.561409417875	1.10162840845169	0.168312724700514	6.54512848278029	5.94442574839965e-11	2.8991766790542e-09
MSX2	31.3432287551738	1.10183894439755	0.170535203825522	6.46106445871941	1.03969017371252e-10	4.76856861020894e-09
BLK	9.50040763620582	1.10252391488025	0.273519536960289	4.03087811252151	5.55688567113419e-05	0.000485906492980678
COL6A3	794.43335059103	1.10285565234291	0.215443902551056	5.11899217979284	3.07172696948891e-07	5.71237964998232e-06
HIST1H3H	5.37287122964577	1.10315314743758	0.265585401877989	4.15366635228082	3.27190151069708e-05	0.000309102157659451
CERCAM	610.52393631253	1.10501237828468	0.147620827548854	7.4854774670531	7.12874887179668e-14	6.89657759706494e-12
CTLA4	15.1458242546084	1.10517476880286	0.19679754287293	5.61579556669797	1.95659885079465e-08	5.01408429075429e-07
KIF2C	81.4650856583982	1.1062374790129	0.154554550839373	7.15758593328384	8.2110119894578e-13	6.13366060174519e-11
ARHGEF4	44.3758644737653	1.10631005384911	0.240666833036344	4.59685300168486	4.28920000683158e-06	5.53469365313019e-05
CD248	187.614467750174	1.10674893602731	0.162070580055417	6.82880838489551	8.5622846725578e-12	5.13853179128689e-10
DPT	12.0953317021992	1.10857617571627	0.281734840882823	3.93482102619088	8.3258715280863e-05	0.000683045549273586
RGS6	2.07485496283634	1.10899858507585	0.255098837297861	4.34732904635292	1.37805403641787e-05	0.000150135807143028
GABRE	82.2914677063075	1.11018310253654	0.236355492545046	4.69709034718098	2.63893743290987e-06	3.64713101578738e-05
SGOL1	11.5491815203913	1.1102011698465	0.168045296701781	6.60655901495835	3.93355507032875e-11	2.030310757e-09
EPS8L3	45.7441549337309	1.11497262332417	0.325780277591857	3.42246814805967	0.000620553679817925	0.00358815280330671
ZG16B	4.70448245026709	1.11678679681816	0.240789394037388	4.63802320398194	3.51757303087318e-06	4.68233931869013e-05
THRSP	9.58256913740316	1.11742279291263	0.337426369372512	3.31160482504857	0.000927624794641277	0.00498263994712098
AMPH	7.80703534020891	1.11867868651911	0.222698718163282	5.02328300650073	5.07956090780031e-07	8.91264086339907e-06
PXDNL	4.66296751602743	1.11973880542123	0.263537255703168	4.2488823921064	2.14839666909324e-05	0.000219983890281242
NLGN4Y	39.2840323524242	1.12130701377463	0.314253502891164	3.56816074748092	0.000359495937770636	0.00229104250622439
CENPI	7.74469902807918	1.121512829478	0.180736997319472	6.20521999430809	5.46204405248925e-10	2.12995656179008e-08
FAM83D	54.9685113749391	1.12174465883087	0.169752127793209	6.60813312571479	3.89196636842797e-11	2.01471849668564e-09
HOPX	108.461647268013	1.12319700021017	0.183048842902085	6.13605080700229	8.45981111872801e-10	3.1267744477236e-08
C17orf99	1.75550905692987	1.12354036466583	0.321027497613948	3.49982594331202	0.00046556204314238	0.0028326630797755
ARAP3	143.68727364609	1.12486102619566	0.149706306576312	7.51378516991382	5.74418188282876e-14	5.61850806925969e-12
AFP	5.97960546367974	1.12608030316694	0.329367899997869	3.41891332814833	0.000628717493330615	0.00362213293261478
TNFRSF13C	2.39542581049121	1.1266881704275	0.249209139797329	4.52105477087954	6.15322636499921e-06	7.50769948765996e-05
RASL11B	16.2952638705486	1.12720415011911	0.225622299832272	4.99597846027224	5.85381946035742e-07	1.00131420025283e-05
KIAA0125	10.3770261388346	1.12776517262668	0.299284284306473	3.7682071253425	0.000164424248861089	0.00121543503208214
TFAP2C	37.4129174883467	1.13064134489778	0.306512772875492	3.68872505472083	0.000225380613506696	0.00157018936430561
GREM1	38.685792295511	1.13125645765524	0.312234499173539	3.62309885886919	0.000291094501849561	0.00193161059248299
EPHB3	44.6118697056459	1.13146465235255	0.201636039578667	5.6114207297308	2.0067220900312e-08	5.12655236391231e-07
GPR98	21.8433708475189	1.13335711490508	0.197840078586571	5.72865277350334	1.01231361120863e-08	2.8179245554776e-07
LOC399815	4.04624167422577	1.13366674076988	0.189688847561064	5.97645436379665	2.28046398513076e-09	7.57473440764635e-08
SYCE2	7.06982159109865	1.1339348851506	0.167086803921071	6.7865017376612	1.14885121326252e-11	6.71262768303617e-10
CCNJL	95.5029647880777	1.13402582725222	0.216437527130221	5.23950648618306	1.61006587811811e-07	3.26513245202783e-06
NCRNA00185	7.48505877254948	1.13593694698453	0.401802383261034	2.82710355713982	0.00469711353228591	0.0184008316526139
KIF15	24.1839819763046	1.13637965316965	0.162780515196734	6.98105453098144	2.92972559267969e-12	1.98727440202304e-10
TYRO3	138.433471961467	1.13754559114253	0.160418314838109	7.09112043902539	1.33030503842552e-12	9.61294710215729e-11
FAT3	41.3877349570297	1.13837958691614	0.272490781094876	4.17768110297933	2.9449615747485e-05	0.000283664851574252
PRSS3	2.13865602994179	1.1394192285827	0.43403246469564	2.62519355408518	0.00865997234249352	0.0299899897720808
FAM182A	1.09566969535814	1.13958199392392	0.293084613705052	3.88823548093433	0.000100975636841177	0.000800211582200627
DSCR6	7.84445253910272	1.14187778406271	0.268044218443667	4.26003511917827	2.04394785520178e-05	0.000210751618104206
ACVR1C	7.4326995511514	1.14254773387297	0.187685680560406	6.08755942627836	1.14644828892665e-09	4.07564668818421e-08
HPR	2.04618829637591	1.14310229896185	0.443731292775014	2.57611378231429	0.00999177603392322	0.033471031770024
GALNT13	19.1013869178064	1.1437701202656	0.283754949766133	4.03083759845699	5.55784369795455e-05	0.000485906492980678
FAM38B	62.261480477128	1.14496840423792	0.223471775801474	5.12354815336985	2.99839025941786e-07	5.58773696344567e-06
SUSD5	16.4074815774796	1.14621737171634	0.167918557914319	6.8260315354852	8.72957482444987e-12	5.22122948283988e-10
KLRC1	4.85373203224025	1.15100579501459	0.226248108923243	5.08736095294869	3.63080402495168e-07	6.6473375861163e-06
FCER2	4.84906672724897	1.15170057015762	0.275033269606522	4.18749546847664	2.82049650604215e-05	0.000274513854551788
ADAMTS12	12.9509608476434	1.15204103958497	0.233311353362918	4.93778387969382	7.90153376941193e-07	1.3012907335225e-05
BACH2	46.4573568910517	1.15262723586384	0.17381150372358	6.63147841869494	3.32341138844238e-11	1.7407596219226e-09
F3	127.408861105093	1.15266025096345	0.18822109091663	6.12396966434545	9.12722812007896e-10	3.3381697933747e-08
SYT8	4.98395097967031	1.1534968449757	0.311616147315884	3.7016594130676	0.000214194014769913	0.00150778959741016
SQLE	239.844231583655	1.15366055511169	0.151406355468416	7.61963096953585	2.54401971326128e-14	2.76314877322563e-12
ZNF683	18.8537091382077	1.1539681981345	0.185962325007352	6.20538702174688	5.45624574170162e-10	2.12995656179008e-08
PIF1	15.0429243197747	1.15414842977116	0.16294177116203	7.08319555839046	1.40867663620243e-12	1.00968466264485e-10
RRM2	205.036009361716	1.15506402721071	0.166015190609176	6.95758034534263	3.46166537149845e-12	2.30395953898528e-10
NTN1	42.4862844016797	1.15684431037139	0.173040238290501	6.68540636443916	2.30284726442462e-11	1.25060147145318e-09
FER1L4	307.156454765533	1.15715409022184	0.227293531422975	5.09101197459274	3.56157531035362e-07	6.52734257707044e-06
GOLT1A	95.3853556715172	1.15744641279181	0.215185505018258	5.37883075671666	7.49711439037244e-08	1.63459252668909e-06
STOX1	32.0880885236115	1.15771341540603	0.228307460040566	5.0708523286989	3.96037991922483e-07	7.19862074845548e-06
MLLT11	138.459177325922	1.15856719111989	0.162229581282826	7.14152857918117	9.22986794770005e-13	6.83705364627957e-11
LOC121838	10.3330290272475	1.15901178230891	0.259590322039968	4.46477269722892	8.01538007398301e-06	9.47924441080796e-05
ANO2	7.15662108984258	1.15958418024037	0.196673355066767	5.89599023134936	3.72441007546308e-09	1.16290927647264e-07
LZTS1	143.509848538894	1.15967143064453	0.156375357759674	7.41594741817808	1.20758406324645e-13	1.09636247465206e-11
HBQ1	3.26559838887883	1.159721314917	0.37156451978086	3.12118421748389	0.00180125316329946	0.00853570289160964
ST8SIA1	22.2703357786687	1.15994353553904	0.204602651093469	5.66924978410541	1.43424141181407e-08	3.81258407729073e-07
MCM10	30.0793065184346	1.16053016882275	0.171230880937889	6.77757518075094	1.22209562711638e-11	7.0705820204145e-10
CA12	7448.2672406714	1.16165436000657	0.177768647984499	6.53464136211392	6.3762145460968e-11	3.07781145387307e-09
UPK3A	3.89952420457034	1.16203459954984	0.263187874613568	4.41522847986834	1.00903358651209e-05	0.000115251165262001
ASPN	53.6835939238312	1.16211872798557	0.189084811035347	6.14601840106725	7.94520706180229e-10	2.95508289542327e-08
CHST6	9.40716310239215	1.16225413812926	0.201592130078036	5.7653745594104	8.14766844696475e-09	2.32280712053243e-07
CHST2	234.359530373391	1.16262307339949	0.175741832782454	6.61551694887961	3.70255558889389e-11	1.92794247487581e-09
CHRNB4	7.78715150538058	1.16290406295162	0.247101370657252	4.7061821626423	2.52399001737129e-06	3.51848183208987e-05
FAM155A	42.3796759008777	1.1630478470175	0.30933392051013	3.75984581677783	0.000170018108974907	0.00125103931890763
RASD2	47.9814049035487	1.1631246378837	0.216026126217819	5.38418504394657	7.27736082937994e-08	1.59256361091894e-06
ARTN	16.703603225895	1.16696830580984	0.169044438886334	6.90332266176773	5.08000634330261e-12	3.25856638774744e-10
SLC2A1	2211.70125702929	1.16720288415336	0.183510365114908	6.3604193878776	2.01203628846143e-10	8.68807084168809e-09
RASGRF2	42.9033517612201	1.16736236641136	0.207410536880593	5.62826934430731	1.82026699946195e-08	4.71830262935203e-07
DCLK3	1.55328144311941	1.16753070893948	0.253445149506713	4.60664057375678	4.09226447753716e-06	5.32325130861998e-05
FCRLA	11.0590320379648	1.16904665286173	0.240074081984622	4.86952462005715	1.11867045578584e-06	1.77782241914116e-05
CPA4	39.5537289085415	1.16930644523278	0.276057514321054	4.23573489063907	2.2780542473502e-05	0.000230988959880229
CAPS	393.830027072883	1.16946298845927	0.168819158151966	6.92731204953974	4.28911808173744e-12	2.81239061181776e-10
GRIK5	132.459247876645	1.16984568153521	0.28771258819632	4.06602188965387	4.78224459734657e-05	0.000427168811056628
MIA	3.05432729464461	1.17023931519646	0.248421790619678	4.71069511365063	2.4687332272823e-06	3.46601530973876e-05
HTR3A	26.8313229346976	1.17041259437907	0.251558141732294	4.65265240997293	3.27692366125101e-06	4.41608051357727e-05
CCNB2	64.8082053762864	1.17103025118884	0.157261366408081	7.44639499157159	9.59253219781973e-14	8.98551270001061e-12
C4orf31	9.32971153986743	1.17117426132506	0.300943275084745	3.89167779540931	9.95533960670411e-05	0.000792131830998155
KRT24	0.811040219695712	1.1720428036233	0.464213650497166	2.52479176854894	0.0115766861986	0.0375717053088937
C10orf91	0.87738942117416	1.17255085925409	0.379949226852877	3.08607249701846	0.00202819364644549	0.00941209444735806
LPPR3	1.75185102891645	1.17345709446729	0.475564294612731	2.46750462084812	0.0136058465302923	0.0427467448043115
CEP55	78.3641409850932	1.17358874640914	0.156864627875525	7.48153845964815	7.34575347212422e-14	7.06789236252648e-12
CTSE	56.1488767233514	1.17386538599966	0.363056283223428	3.23328762024827	0.00122374288581831	0.00628704122185936
PTTG1	109.733348279821	1.17508441106435	0.148939588135118	7.88967141495189	3.02983207586202e-15	3.94412846110745e-13
HS3ST3B1	3.18964022737905	1.17521505006093	0.22007860970262	5.33997852698601	9.29575911718685e-08	1.98146584320457e-06
FAM174B	276.134084702259	1.17542574989302	0.188874850132369	6.22330473892763	4.86790552517029e-10	1.92799551269832e-08
SLC16A5	228.729352752821	1.17720357946688	0.194966357072397	6.03798315331782	1.56052352678235e-09	5.39599775745211e-08
BTN1A1	1.05852393399224	1.17802835302118	0.287127177661968	4.10281033865789	4.081618289279e-05	0.000373828092050675
SKA1	23.2021424912726	1.17819028062854	0.157497389482275	7.48069720076936	7.39293411649623e-14	7.07483814045672e-12
TNNT1	52.6680875690244	1.1805153966488	0.409023053162582	2.88618303423488	0.00389945307042063	0.0158593882744606
SAMD5	250.432200114345	1.18112260086828	0.208010664504073	5.6781829128052	1.36133101906948e-08	3.6406350999405e-07
DCAF12L2	9.91629036991963	1.18208501332808	0.265813142756455	4.44705254627358	8.70565481805401e-06	0.000101665509827723
EXO1	26.354233179718	1.18283650304582	0.16947466030608	6.97942985051311	2.96380371665945e-12	2.0027168320511e-10
KIAA1211	74.0328350780673	1.18483329586406	0.195482921530267	6.06105784888534	1.35229180765479e-09	4.73141781871944e-08
FOXP3	16.7851946335829	1.18535361499345	0.159680883866917	7.42326561757615	1.14267291785387e-13	1.04702993141525e-11
GJC1	81.5689545619337	1.18806882575596	0.173667995984962	6.84103492424037	7.86230840619054e-12	4.81641204232516e-10
GABRB3	151.386749512493	1.1908944853642	0.301596879836704	3.94862999248863	7.85997306101892e-05	0.000650551487013927
ACAN	71.9157091049124	1.19121304904471	0.238525013992715	4.99408019773177	5.91168302529877e-07	1.00635034884509e-05
LRRC10B	6.50992561552716	1.19417150767305	0.218662399530974	5.46125676035079	4.72775687412435e-08	1.09698830536694e-06
HOXA11	79.1434848247028	1.19651284160174	0.223192424343527	5.36090257149643	8.28071715671614e-08	1.79000996999393e-06
APLNR	122.04334571457	1.19653155373676	0.227519803974668	5.25902155695416	1.44823913508871e-07	2.96411857197809e-06
DRP2	2.01940275688687	1.1974654313156	0.247876608507043	4.83089323566235	1.35921878749891e-06	2.10346236135321e-05
KLK7	2.23460488786127	1.19846086710625	0.457349443736172	2.6204489445003	0.0087814078036044	0.030311180299281
LUZP2	1.57467651603405	1.19960029463117	0.407435800352613	2.94426825917846	0.0032371927624142	0.0137009946607174
ACTC1	13.8490489731665	1.19999097589498	0.314032075543485	3.82123696701425	0.000132783986925695	0.00101502923339054
MKI67	288.473186344539	1.20058968221681	0.15737748793374	7.62872567086776	2.37085534126693e-14	2.59096438035739e-12
PDZD4	51.2201355585362	1.20205585032506	0.165939750012569	7.24392949991796	4.35868050346942e-13	3.44491426934922e-11
CDRT1	1.84028072537012	1.20205657490774	0.253735401348237	4.73744132084267	2.16433497031961e-06	3.10011216137041e-05
PRSS35	12.4216041760645	1.20347797338828	0.243801540423468	4.93630176125188	7.96178861393484e-07	1.30999540540058e-05
SIT1	37.3351687798032	1.20350311378758	0.195854010906309	6.14489898990785	8.00144170559038e-10	2.96975941207069e-08
FNDC1	96.9601913709507	1.20383659535305	0.220237869471152	5.4660744686814	4.6011110144622e-08	1.07606432496749e-06
ISLR2	9.37100884714352	1.20393434241967	0.190721867539731	6.31251338900019	2.74539701410934e-10	1.14904275975867e-08
CXCR3	44.4423336288781	1.20398775208818	0.177157436566948	6.79614570756783	1.07455103059796e-11	6.32021642714493e-10
DLX5	7.17117185750246	1.20406432750795	0.214166799856145	5.6220867488178	1.88664477750944e-08	4.86188633784965e-07
NDC80	40.2048082496267	1.20680509504996	0.161348082962354	7.47951306822488	7.45984938867384e-14	7.10049320306891e-12
KCNQ4	6.46360603485664	1.20718796676342	0.253833827687138	4.75581989115862	1.97642622034831e-06	2.87043886833852e-05
NPTX1	6.31606002020763	1.20794618448112	0.243395485991814	4.96289477004412	6.94502142826378e-07	1.16214233805276e-05
GRIN2A	21.5960228908174	1.20807532501007	0.28200189875684	4.28392620877971	1.83623835161988e-05	0.00019258746313435
DPYSL5	16.7553394213106	1.20934995655916	0.34986691555323	3.45659993213951	0.000547036333482043	0.00323147522454658
GABRQ	0.629491275615131	1.21007861210585	0.425669742876473	2.84276397924999	0.0044724176751599	0.0176894491499439
IRX2	25.7523005898096	1.21072713967861	0.289829056432508	4.17738357423992	2.94881515055177e-05	0.000283881584694772
KLK5	2.13108150352799	1.21177873784268	0.491959128052522	2.46316953735496	0.0137714780095485	0.0431369863200719
SRCRB4D	74.4388995056647	1.21240461030562	0.175502236902246	6.90820032670537	4.90840538899463e-12	3.16619151590639e-10
MYH11	978.322740942807	1.21308982251629	0.21409976907442	5.6660024798748	1.46167409896507e-08	3.87968189626351e-07
LPAR4	1.02533659292515	1.21487001996354	0.328460899938356	3.69867469824122	0.000216728155770987	0.00152079083225111
NCAPG	67.3580512179684	1.21498069062392	0.15582713160331	7.79697783128618	6.34073742309545e-15	7.5848929282758e-13
SLC36A2	16.2233301932773	1.21604695068175	0.395157490066367	3.07737289878401	0.00208833875824863	0.00962309978553715
LRRC4C	16.1042265134135	1.2172026060227	0.276017426278584	4.40987593585549	1.03429857623668e-05	0.000117605793151536
DACH1	60.7692139211103	1.21801283402572	0.243224984867075	5.00776198913683	5.50665692278465e-07	9.52049357040815e-06
NKX2-8	5.41390796414589	1.21832643140206	0.393131019888434	3.09903408728165	0.00194152680753366	0.0090933308467132
RGAG1	2.83812654605227	1.21923099772845	0.288556000129573	4.22528381728664	2.38639820937765e-05	0.000239099003388918
COL5A1	707.847973534307	1.21927485332624	0.211545574077779	5.76365097044269	8.23135543377712e-09	2.34289254983264e-07
GPR156	2.47571618288651	1.21962775526184	0.25008003406771	4.87694973254688	1.07738876792966e-06	1.72460133340205e-05
C14orf180	4.21890835728865	1.21990419731999	0.379045274519974	3.21836012562057	0.00128925835031793	0.00654540414478131
C15orf42	23.8180804256747	1.22003637248963	0.155167880359059	7.8626863347393	3.75981668353909e-15	4.71297338427201e-13
LOC257358	1.91485846784531	1.22129121443064	0.245399124750543	4.97675456533161	6.46592227089186e-07	1.08711004638053e-05
TRPV6	13.4715294482145	1.22134313287818	0.254126062971563	4.80605223485027	1.53939695263776e-06	2.31157622133154e-05
LEF1	50.0065466870236	1.22297055709304	0.196946241269	6.20966690815205	5.30970270053359e-10	2.08145288624666e-08
MKX	11.5269770827553	1.22504329675625	0.232530266948699	5.26831759508762	1.37679755485459e-07	2.84752615784412e-06
SPIB	12.7704589674636	1.22523840072882	0.215723548508955	5.67966923035276	1.34955466980117e-08	3.61460149382146e-07
TNS4	13.1951567061324	1.22549571162319	0.243000407892325	5.04318376356887	4.5784916047812e-07	8.17113058175871e-06
CD79A	75.1963036622242	1.2264448255318	0.266084948333912	4.60922285612611	4.04176913377802e-06	5.27365513386025e-05
CENPE	42.158821340517	1.22668433044201	0.151751097159075	8.0835285767728	6.29192038738067e-16	9.45763677597136e-14
PYY	0.504792781003252	1.22669266708593	0.414980073398149	2.95602788114839	0.00311628919174232	0.0132749720526001
LTA	6.35935934579417	1.23227894065521	0.181706790746	6.78168898144127	1.18778970000205e-11	6.91731212132776e-10
FATE1	3.71939162888259	1.23275943092754	0.218280143385209	5.64760225923086	1.62701059818693e-08	4.26734750078539e-07
TRPC6	15.71259209126	1.23417921056941	0.215338511291285	5.73134458471272	9.96376174530833e-09	2.78230974667096e-07
IL17B	1.09791584542205	1.23499768479599	0.286509562319345	4.31049377479225	1.62890414721407e-05	0.000173619018797579
PAK6	62.0973876090913	1.23516831832473	0.2081818679476	5.93312150814031	2.9722871011047e-09	9.60243993393386e-08
RTBDN	0.741801627958225	1.23619595785764	0.392612475921458	3.14864155795432	0.00164031256548432	0.00793228452863547
CA10	9.47567608226361	1.24067813397408	0.368936905038222	3.36284637571171	0.000771432805541344	0.00428670633688134
MAP2	585.389652044498	1.24073478892227	0.177277263673772	6.9988376580851	2.58094704408818e-12	1.77104986312159e-10
TROAP	51.5089041804346	1.24176382655367	0.168551742931047	7.36725592367009	1.74175922986921e-13	1.48250506757714e-11
TTC24	1.17363182849845	1.24271395455356	0.283257782764952	4.38721909923572	1.14809123491315e-05	0.000128400550997488
EPHA10	43.0300030635057	1.24345844224727	0.256976765035663	4.8387971654741	1.30627273741562e-06	2.03755529015033e-05
TNFRSF13B	3.36882579661015	1.24459275999079	0.332709853707259	3.74077517128743	0.000183453572762733	0.00133109100499649
C20orf203	2.2333912141346	1.24535681079307	0.266520430885681	4.67265044805229	2.97337565392484e-06	4.06177797662696e-05
PDE1A	318.927977425577	1.24634715205957	0.306521492596175	4.06610036217449	4.78063545584953e-05	0.000427168811056628
KIF20A	89.3925746611086	1.24857290866612	0.178242380344843	7.00491603764783	2.47133994548127e-12	1.70908603104689e-10
FAM57B	4.82413676150453	1.2492875104494	0.22984848589496	5.43526534701784	5.47149470296281e-08	1.23397888179941e-06
CDH12	5.74078482778937	1.24974438943547	0.218885728597991	5.70957456861326	1.13258926250535e-08	3.11356526450227e-07
PDE1C	13.8348575136952	1.2503547357439	0.323431229208794	3.86590601904036	0.00011067755466952	0.000865092904136505
HOXD3	43.7488312936624	1.25048949597819	0.204149667273116	6.12535652240499	9.04807736711104e-10	3.31650438317461e-08
SPRED3	1.64189469373407	1.2521762653462	0.265603866838287	4.71445043421971	2.42363990164089e-06	3.40811126438842e-05
FLRT2	41.2802571136228	1.25230980126237	0.201596808052862	6.21195252721458	5.23302384494568e-10	2.05878787002041e-08
CYP4F2	8.7086869250308	1.2528027798116	0.428832296399643	2.92142823740138	0.0034843053517301	0.0145657950288146
TMEM132B	6.59002563119677	1.25290503004262	0.195827818065662	6.39799310648763	1.57432393314018e-10	6.91608707501584e-09
RCAN2	783.582802094576	1.25341922515218	0.16944186961769	7.39734062177349	1.38938834813826e-13	1.2237677271363e-11
TOX2	41.6633319509679	1.25390950316508	0.171705184331744	7.30268866397452	2.82073372259882e-13	2.33356401050886e-11
TNMD	4.64049353879674	1.25432887311087	0.289051484907098	4.33946524617929	1.42829851846154e-05	0.000154536724591156
JAKMIP1	8.3847407772755	1.25525541664474	0.202488976678891	6.19912963773501	5.67762530682556e-10	2.1946873020096e-08
NQO1	4134.54550860199	1.25719071254638	0.219323093913779	5.73214015046044	9.91712735515606e-09	2.77366228587177e-07
TRIB3	576.955962701627	1.25743699705782	0.171146961136486	7.34711845718978	2.02525374255735e-13	1.69929347195428e-11
RLTPR	37.9773713729283	1.25973624204833	0.187938380361773	6.70292166838618	2.04292991203483e-11	1.1236032211436e-09
SLC38A4	81.10228273559	1.26121945130508	0.254977907802565	4.94638716810581	7.56035166041693e-07	1.24975224832886e-05
SST	342.867561918908	1.26150851106407	0.422599654912225	2.98511486320567	0.00283471856631981	0.0122793876922256
CRLF1	17.2894953515815	1.26424426189794	0.271592728171257	4.65492677366806	3.24095869898782e-06	4.37665391356829e-05
PRTN3	2.49809932415355	1.26584197648368	0.401866432224237	3.14990722036061	0.00163322320200737	0.00790987791499269
CLEC4GP1	0.531597369772547	1.26719234807895	0.440868034754425	2.87431214827088	0.00404908560439361	0.016344051878747
UNC5C	3.20430388485098	1.2694663164119	0.301672360715434	4.20809620543719	2.57531227023044e-05	0.000255138939183882
WISP2	38.2805009836075	1.27159071582866	0.252038360920127	5.04522689001155	4.52983507276548e-07	8.09245208155804e-06
TPTE	1.30927414969248	1.27173621146935	0.315594761117302	4.02964931029594	5.58601257196024e-05	0.000488128166702784
ZSCAN4	1.28058242673303	1.27261968719508	0.377144187640078	3.3743584785392	0.000739879485642681	0.00413864973580348
ZNF648	2.00529625409977	1.27344002713306	0.320379962143431	3.97478050316691	7.04441936472483e-05	0.000594374838024222
MYBL2	147.26211513545	1.27437124721436	0.1734192281154	7.34850028490697	2.00443039468186e-13	1.68983027178322e-11
ULBP1	6.57816875768042	1.27593297912959	0.183590414590972	6.94988887068148	3.65574072732621e-12	2.42401624856117e-10
OLAH	1.2465454863028	1.27602485035847	0.393553719603359	3.24231429357218	0.00118563190310021	0.00612859188685724
LAD1	832.484624096198	1.27756994757134	0.226929368410421	5.62981317279634	1.80404926997377e-08	4.68999827835764e-07
PMAIP1	75.2195901451397	1.27973827841248	0.164899524231024	7.76071540764165	8.44516330401567e-15	9.90153451220486e-13
KRT23	136.262268051098	1.27998413741941	0.269244738643134	4.75398012926799	1.99450649155583e-06	2.89195273763345e-05
CEACAM19	88.0975443849584	1.28036360028861	0.176676288184538	7.2469464547007	4.26272384480461e-13	3.39942625893788e-11
FAT2	24.8229915918705	1.28039597106048	0.187425373382874	6.83149750724987	8.40327520212573e-12	5.09491726638473e-10
SCN9A	34.0541234161927	1.28066717761615	0.264436262518321	4.84300891798992	1.27887546414439e-06	2.00364701037276e-05
GLT1D1	21.4192157698924	1.28153302114869	0.217274838403349	5.89821182501421	3.67462048341297e-09	1.15142444315652e-07
ZSCAN12P1	14.4913791716092	1.2822688552272	0.164645626217643	7.78805295156879	6.80496645638543e-15	8.03167507625651e-13
CSPG5	12.5665951816636	1.28313087911492	0.189961017279934	6.75470629441853	1.43124889953543e-11	8.12142003762025e-10
GUCA1A	0.623867031825804	1.28344733037673	0.425663073405401	3.01517188256162	0.00256833662152082	0.0113567812693238
CENPF	232.144711175601	1.28403671775014	0.163321682391642	7.86201010758048	3.78017521784131e-15	4.71297338427201e-13
SFRP1	155.912413793768	1.28643968440647	0.272710149243796	4.71724168672733	2.39063637282111e-06	3.36437411322932e-05
GOLGA8C	3.15352688635731	1.28679123280207	0.30831000742356	4.1736927177789	2.9970191778214e-05	0.000287583889019784
MSI1	11.5234295259993	1.28848067985341	0.236519418201339	5.44767397811109	5.1032789054504e-08	1.1688027133518e-06
SLITRK2	100.115792898408	1.28915601969168	0.297557479136734	4.33246048269984	1.47452135337023e-05	0.000158403677427589
NELL1	2.36673261747415	1.28952691346448	0.40896469395443	3.15314972790334	0.00161518938097592	0.00784292726297248
FOXE1	22.7821713493556	1.29110393883034	0.362109063147681	3.56551125124359	0.000363147581323358	0.00231098662104555
HPCAL4	6.25597050519825	1.29433075191894	0.249250574918292	5.19288973493139	2.0705482644168e-07	4.04602499704581e-06
KLF14	2.08106536111576	1.29502872952983	0.35467489879594	3.65131204358195	0.000260904006939493	0.00177207279753424
DLGAP3	15.1458289143109	1.29570804887394	0.183011441642642	7.07992919592431	1.44228132925088e-12	1.02546781739187e-10
SFTA1P	1.60097260018223	1.29611810904748	0.383751969038735	3.37748914303721	0.000731508407674188	0.00410479393009947
GBP4	370.561265897276	1.29676223081342	0.1487333342129	8.71870611706457	2.81398906618883e-18	6.91928644830654e-16
CDH17	324.509479147413	1.29685452123338	0.265945024495668	4.87640076625876	1.08038999281961e-06	1.72495883957945e-05
FOXD1	25.7151901900369	1.29854548257156	0.258392413569287	5.0254783591909	5.0217919680663e-07	8.8639885346606e-06
GZMB	28.7020949012326	1.29954088807661	0.18840244557269	6.89768587730573	5.28564605459397e-12	3.36608193347236e-10
CACNG4	4.64987042332189	1.29968975188379	0.266130900973892	4.88364841184411	1.04140698660503e-06	1.67153846698599e-05
SYCE1	2.96583242657052	1.30139444229315	0.384269163788034	3.38667414648711	0.00070745360703606	0.00399131888431052
IGFBP3	10542.7574550827	1.30150399552705	0.200606842649463	6.48783450423609	8.70788528141076e-11	4.06766229609752e-09
DMRTA2	1.08161603922408	1.30550426463737	0.347992221152266	3.75153289436931	0.000175756687945043	0.00128631517295537
RAET1E	2.11572559796204	1.30580630651005	0.24430969788315	5.34488118083057	9.04763843203463e-08	1.93453370532296e-06
CRYAA	5.25293797592473	1.30883044216994	0.289478779185637	4.52133467555705	6.14509432158095e-06	7.50769948765996e-05
UCHL1	2315.4304138938	1.30992379657915	0.240207227615135	5.453307169749	4.94415554071958e-08	1.13824876063588e-06
LINGO1	50.8529683553758	1.31041463147553	0.170847768639758	7.67007167789598	1.71900261043277e-14	1.90207638844386e-12
TBX1	2.86207186921677	1.31178517910585	0.266473423542213	4.92276175863386	8.53313122647074e-07	1.3959265350585e-05
UBE2C	112.579813943641	1.31303902021204	0.178771825034585	7.34477605717805	2.06103887319003e-13	1.72116189674322e-11
LMX1B	20.5089235446999	1.31545283128485	0.284483686906066	4.62400092459151	3.76408185431565e-06	4.9693739857423e-05
DEPDC1	27.2130681616915	1.31594462813511	0.181474625796075	7.2513973915772	4.12493461039719e-13	3.31944737920326e-11
PHACTR3	62.8839909873021	1.31711036983367	0.317133779777158	4.15316958905849	3.2790154211048e-05	0.000309384113724131
COL22A1	139.406383064397	1.31773310810785	0.262966047355787	5.01103895867205	5.41369522113998e-07	9.38727328061333e-06
ISL2	1.09436261039116	1.31775103679417	0.408041321649386	3.22945487841171	0.00124026450970065	0.00635565049409796
CILP2	12.4610937061943	1.31791431566609	0.20044264102022	6.5750197111659	4.86467231642437e-11	2.43288583869992e-09
CADM2	1.07479690815125	1.31857108866257	0.507284826622411	2.59927169011114	0.00934218001184583	0.0318126476110249
C9orf152	1.28187922352098	1.32033776519119	0.304473250783782	4.33646555745815	1.44792102897157e-05	0.000156099409389893
CEACAM6	11.4165195646285	1.32044310577951	0.420277049686839	3.14183966686598	0.00167889945189645	0.00809456315260748
BUB1	82.5270075076283	1.32046741785799	0.167907140071171	7.86427198568378	3.7125013614448e-15	4.69472315021563e-13
CYorf15B	57.1977897158308	1.32175890117214	0.32703348965974	4.04166222409622	5.30736452303861e-05	0.000467703242985941
SRPX	53.648007892605	1.32238971113171	0.232644617666884	5.68416206828044	1.31455573812514e-08	3.53691410148443e-07
VIT	1.2819114302241	1.32339394060901	0.458177878582274	2.88838462630266	0.00387226054280519	0.0157669044732804
KIF4A	56.4718618526169	1.32377987342352	0.17445639708523	7.5880271262096	3.24812925810645e-14	3.44340601110877e-12
PGLYRP2	1.46297471291878	1.32400324957248	0.366929728317748	3.60832919055811	0.000308175307327514	0.00202146559500789
LANCL3	1.79250864308051	1.32453130240847	0.281480456091005	4.70558887392252	2.53134197146724e-06	3.52595422996507e-05
LOC441601	1.02263390251919	1.32486412278892	0.413956931069802	3.20048783665738	0.00137195159934539	0.00685743396804368
CYP4F3	115.961189757134	1.32511790479821	0.2910685003809	4.55259811028719	5.29874365686995e-06	6.62025107277527e-05
CACNA1E	16.1287923980055	1.32646863758879	0.235930212203467	5.62229239401032	1.88439961322773e-08	4.86188633784965e-07
PDCD1	39.9221925726133	1.33038029692128	0.18331768006715	7.2572394350286	3.95070028514408e-13	3.19375332640141e-11
LRRC15	13.1711379196965	1.33190862526695	0.280001018277899	4.75679921972653	1.96686618237764e-06	2.8588997448944e-05
FAM83E	7.02566815127469	1.33193985796266	0.398284945156821	3.34418831080402	0.000825237016870757	0.00453023136331159
CLNK	0.628954196879003	1.33212931302531	0.317563949040141	4.1948379753173	2.73066709893215e-05	0.000267387888935259
AFAP1L2	149.918369079582	1.33449222229402	0.176971037925203	7.54073795316748	4.67319338205896e-14	4.69368860188173e-12
KRT6A	10.0510829844636	1.33503109179646	0.524998212515989	2.5429250233034	0.0109928814841941	0.0360737671540634
MT1G	117.029591918195	1.33572225812674	0.252886465247949	5.28190489284234	1.27847566400948e-07	2.6565883985474e-06
CCR8	1.44426179322173	1.33586289711116	0.291972607268122	4.57530214772658	4.75533184196323e-06	6.07419876840671e-05
KIF18B	45.5497651326609	1.33812083577661	0.169169893430996	7.90992302848751	2.57548083403374e-15	3.45426611255556e-13
LOC100132354	0.798384947784326	1.33853193818584	0.497263545062632	2.69179583236339	0.00710684373284196	0.025495351863472
SCTR	13.7199982625146	1.34132749957492	0.224981934908727	5.96193423316003	2.49269479533942e-09	8.18387545939521e-08
DLGAP5	36.5366910045979	1.34159382791557	0.187200756471742	7.16660473601281	7.68805872149004e-13	5.84160478992531e-11
HOXA13	16.130585575173	1.34232816515971	0.470264200378024	2.85441282598308	0.00431164628979022	0.0171690026798124
TTK	34.3333338429926	1.34427035199058	0.171631302980486	7.8323145524533	4.78969376774579e-15	5.84805092856355e-13
IFITM1	1138.20264227101	1.34435542658789	0.166898068401311	8.05494898452243	7.95119648024505e-16	1.16571777917486e-13
MT1H	8.81107113465053	1.34443894820134	0.309062856513461	4.35005022398343	1.36106354930235e-05	0.000148376041113601
NOS1	1.52617389973297	1.34544120335658	0.41495252164849	3.2423979447372	0.00118528390998977	0.00612859188685724
UGT1A5	1.02233688062103	1.34666027841838	0.474184009437137	2.83995295416411	0.00451201875961405	0.0177908196258813
C17orf55	10.595532824052	1.3467721453571	0.278376340614284	4.8379547715342	1.31181981567613e-06	2.0426084447432e-05
HTR1F	2.69430821552658	1.3472535535372	0.25687114142073	5.24486147445628	1.56399790372327e-07	3.17534620269688e-06
NKAIN2	3.73979052862258	1.34732530467173	0.278943768075279	4.83009645265897	1.36466928381843e-06	2.10637358332358e-05
KDR	309.906074582358	1.34753680095858	0.167627031712909	8.03889913928966	9.06491541501311e-16	1.30475823176741e-13
GPC5	1.44908716263418	1.34797263890875	0.319815791453755	4.21484077687785	2.49954470070698e-05	0.00024916632534525
C3orf72	0.747477541143843	1.34858895789192	0.518616782622019	2.60035734106739	0.00931267305035662	0.0317404241189738
PTHLH	12.0579197820013	1.35002195691984	0.200423287724466	6.73585376353967	1.62970132323235e-11	9.15943880206527e-10
HRH2	39.2536181985561	1.35138372781708	0.224557003198049	6.01799858642226	1.76586735727376e-09	6.02368317787565e-08
MECOM	448.195829524262	1.35159181122961	0.224516396639277	6.02001382287087	1.74402176592054e-09	5.96064890808055e-08
KCNIP1	22.1224600376214	1.35292077911427	0.260355844305616	5.19642945877626	2.0315263883157e-07	3.97855566136517e-06
APCDD1L	6.37916903687633	1.35315497708403	0.306114887591416	4.42041544509963	9.85113268672509e-06	0.000113102758161985
CYP26C1	0.882194136419131	1.3535011289869	0.329928110638947	4.10241226904149	4.0886490582793e-05	0.000374278401901637
EPB41L4B	78.1848317384558	1.35374189236108	0.210311782788634	6.43683332626971	1.21991763027027e-10	5.49552715682059e-09
ZBED2	50.7107827928411	1.35413398111822	0.281607253322538	4.80859056413321	1.51998164663714e-06	2.28630034596974e-05
PTGFR	81.4704000419443	1.35476447426338	0.237458499308683	5.70526840777455	1.16159896999783e-08	3.17360311185827e-07
TRPC3	45.01301208473	1.355297785564	0.28398528619357	4.77242255656934	1.82023108128731e-06	2.66545666361543e-05
IGDCC3	1.1971089867287	1.35602273575525	0.277622844330154	4.88440617711792	1.03741025535708e-06	1.66663440660996e-05
GNG4	14.496492240687	1.35660636960402	0.247917425830818	5.47200893627295	4.44962390123214e-08	1.0475550737688e-06
LAMP3	60.0637432230852	1.35755852194912	0.171128876589021	7.93295993644248	2.1398347829447e-15	2.93671589125991e-13
KCTD15	191.267913048296	1.36008415718288	0.165781695422322	8.20406712404601	2.3238824653469e-16	3.80944584875014e-14
LOC84856	51.0934738599948	1.36096791982309	0.306616180662483	4.43866959950562	9.0516643462769e-06	0.000104944771176481
IL1R2	44.2096563150077	1.36173739470086	0.217187955708919	6.26985686317661	3.61380151699953e-10	1.48442556976705e-08
SLC7A2	290.890575337796	1.36477169342774	0.204355088979264	6.67843262550814	2.4151120861689e-11	1.30357147480287e-09
SPOCD1	24.0558647670966	1.36877498708474	0.222582013587025	6.14953097524016	7.77124089504657e-10	2.90874375982002e-08
SCG2	64.9424322920346	1.37079106144576	0.211721699296931	6.4744948958835	9.51296268472259e-11	4.38587217110231e-09
MDFI	26.4280372831838	1.3708206246194	0.223732342162889	6.12705615722454	8.95198832042028e-10	3.30179169218168e-08
ACTBL2	2.87282610121563	1.37114827742899	0.337249319506971	4.06568137612106	4.78923304902733e-05	0.000427577316691779
NUF2	31.54779572408	1.37389076127349	0.177674358312036	7.7326338720224	1.05343944947399e-14	1.21104493594074e-12
IL20RB	32.0467101039154	1.37389503554453	0.166237310881356	8.26466109359218	1.40092165066667e-16	2.38511860316735e-14
IBSP	4.49318623218579	1.37410511004492	0.393891755320304	3.48853483599201	0.000485675530943161	0.00293621941773642
C16orf81	2.18197783562132	1.37430005742174	0.320436721301235	4.28883447515304	1.79613162237202e-05	0.000188716404999848
C1orf168	17.3824053274919	1.37559489503188	0.304826274524256	4.51271760342435	6.40022146740876e-06	7.76624543241978e-05
HJURP	56.3189752082946	1.3769664794862	0.172329347003858	7.99031913847718	1.34589883389207e-15	1.89109467898612e-13
HOXA11AS	33.5459761823718	1.37822467194127	0.257805004861147	5.34599657087176	8.99209103875126e-08	1.92731210351153e-06
PTCHD1	11.6893285156313	1.38316529947414	0.270314989055502	5.11686497410671	3.10655845810337e-07	5.77109243885227e-06
SLC9A2	86.8504309975767	1.38500697850648	0.234300008094784	5.9112545055747	3.39511980089927e-09	1.07142960704315e-07
TRIM31	7.03158194507098	1.387462318565	0.201678779624559	6.87956522321224	6.00355061571398e-12	3.7424950739648e-10
NETO2	194.438626517135	1.38831122652276	0.212677294719311	6.52778298856509	6.67503126142415e-11	3.1939122554663e-09
PCDH1	529.677338539736	1.38854096257447	0.198477689459115	6.99595489225253	2.63458297773085e-12	1.8008747891022e-10
ELN	311.697463417447	1.38936454940669	0.194137675151121	7.15659414549585	8.27060878942291e-13	6.1522209247035e-11
HCN4	28.698048617585	1.3918214535167	0.277381758193919	5.01771083498458	5.22908025310944e-07	9.12974721903842e-06
LYPD6	15.5453478940422	1.39196739717527	0.214617427337781	6.48580786025583	8.82575835387661e-11	4.10108204454151e-09
RHOV	50.8928707474439	1.39274085909935	0.233991476042375	5.95210083142999	2.64722188429261e-09	8.59934242926907e-08
IL13RA2	2.53848731633159	1.3977182909112	0.333141902845061	4.19556434952963	2.72192991330068e-05	0.00026681636968334
NEK2	42.3294420841915	1.39843420185599	0.176954603791302	7.90278507534786	2.72739633992676e-15	3.63051314301228e-13
HCN2	60.2747659526877	1.40023258274985	0.268264245073234	5.2196019725536	1.79308067529332e-07	3.58292328164707e-06
ANGPTL4	1056.18083208969	1.40059135563964	0.242032732734805	5.7867848691948	7.17463673931896e-09	2.05866724202436e-07
TOP2A	444.774454674118	1.40082624970976	0.177830845502196	7.87729623482257	3.34541120655984e-15	4.26094676265722e-13
DQX1	1.01047134382691	1.40259123794829	0.352931318637003	3.97411950677828	7.06400900870074e-05	0.000595246147025407
FHL5	17.0867273367692	1.40289553673023	0.227338003387409	6.17096796763691	6.78731733239472e-10	2.57171398748335e-08
FAM196B	4.23777545738176	1.40478902387493	0.282003053708761	4.98146741817103	6.31039103190837e-07	1.06399202694196e-05
PSG9	3.82589387196133	1.40599672356651	0.432430914002577	3.25137884003855	0.00114846713972306	0.00596588490151936
CNTN5	1.64162232892161	1.40841537434561	0.361543811581966	3.89555934641217	9.79723687370916e-05	0.000782364824592454
TRIM58	37.845685449662	1.40977534349455	0.231637773031177	6.08612026029455	1.15679565213074e-09	4.10213087645397e-08
CYP4F11	528.503302316668	1.41033432970163	0.202446752446181	6.96644580691191	3.25048023301755e-12	2.17156611491859e-10
E2F7	22.5642196408924	1.41041415335407	0.172685927128015	8.1675106756586	3.14817893365952e-16	5.11333576527598e-14
SPDEF	4.42782604160833	1.41081481797516	0.256889301972016	5.49191736341303	3.97593430882776e-08	9.48209439899237e-07
TFF3	25.4021884074209	1.41222769896151	0.240235044783675	5.87852492642435	4.13938483169064e-09	1.27449859235219e-07
S100A5	1.81421154864214	1.41262775651186	0.259505617160024	5.44353440966468	5.22336379130057e-08	1.18946459034339e-06
SFTPC	0.856341285214903	1.41387053457707	0.495375791311501	2.85413732236262	0.00431538733986383	0.0171800354092533
SLC4A1	9.29334780325705	1.41524786313143	0.327768318268368	4.31782995564772	1.5757074828423e-05	0.000168151448319711
KIAA1324	40.1842303305511	1.41730737941815	0.186428118304103	7.60243354012846	2.90613234049147e-14	3.11819193673097e-12
B4GALNT3	79.5672689182935	1.41832271499401	0.249990630525901	5.67350349095208	1.39906248594879e-08	3.72466199266728e-07
TCAM1P	1.97075545831287	1.42094250985179	0.284011927020701	5.00310858335263	5.64131437694764e-07	9.74378826629083e-06
ESM1	346.495030184449	1.4217650608524	0.192892875928662	7.37074945877325	1.69671450971449e-13	1.45818610097016e-11
CHRM1	3.59601035998344	1.4232902746714	0.382174924881382	3.72418539785977	0.000195946893002389	0.00140504001365504
CKAP2L	22.4970943295504	1.42462522552114	0.182273233103236	7.81587730280868	5.45815230616051e-15	6.5735461515827e-13
LY6D	7.02800518236476	1.42538024251661	0.471370160312788	3.02390851718481	0.0024953188180375	0.0111081529682011
ASTN1	29.6919736530356	1.42608076537373	0.407693251001503	3.49792585938215	0.000468891460729026	0.00284874894328987
NXPH2	0.914197482101158	1.42767695526735	0.380740714954304	3.74973544775398	0.000177021222929806	0.00129302824165119
NTS	2.03544907595025	1.42888431444912	0.524556441238105	2.7239858328239	0.00644992731846103	0.0236270459851095
FOXL2	0.898606547589663	1.42892218095179	0.414794976677202	3.44488786339328	0.000571296344820443	0.00335569004232212
CECR7	8.77589725879809	1.43002217062408	0.303776328015896	4.70748389107282	2.50793092694643e-06	3.50143794517211e-05
DLK2	2.1734644896699	1.43125696398454	0.240480682414279	5.95165045946973	2.65451828714322e-09	8.60725123728637e-08
ZNF488	5.54062652696166	1.43203104193821	0.220700956815661	6.48855837600337	8.66615787982075e-11	4.063782085876e-09
CPB2	0.775225436449422	1.43287414799041	0.40047402612224	3.57794527116982	0.000346305938891364	0.00222298779627727
LGI4	29.3973743173852	1.43544426529534	0.189555092880684	7.57270218109561	3.65539673201043e-14	3.78451133002998e-12
TP53TG3B	0.980742895092084	1.43798129971729	0.4701221394864	3.05873980172101	0.00222270109460036	0.0101054699996931
CNTNAP2	11.8575466770982	1.44133287428416	0.250770585729149	5.74761537559636	9.05108377315665e-09	2.56795492179432e-07
PVALB	35.8274838912844	1.44169623075797	0.382668435075235	3.76748145029136	0.000164902789555924	0.00121785881721898
AIM2	10.7896800219127	1.44283230876422	0.208764006440106	6.91130781291152	4.80205789007161e-12	3.12557473844955e-10
NAT8L	37.7596790787797	1.44341388828653	0.214725100961063	6.72214790830751	1.79065043332074e-11	1.00005284768172e-09
BRSK2	19.6836823817905	1.44552184991067	0.280805652125971	5.14776621826044	2.63606736347384e-07	5.01277514532125e-06
REN	38.1450806485564	1.44704045578952	0.356330553716736	4.06094970160725	4.88735009934886e-05	0.000435239668807205
GATA5	9.45181822117269	1.44928234280252	0.32444538582873	4.46695316409144	7.93414914191652e-06	9.40201983992571e-05
CA8	5.33252245317604	1.44949353812005	0.248594794595311	5.83074774546139	5.51795471409636e-09	1.62816450430603e-07
ETV4	111.090179436288	1.44959127073462	0.235723942630397	6.14952921013842	7.77132737457564e-10	2.90874375982002e-08
CNKSR2	1.90147871346894	1.45055862409418	0.314485462461626	4.61248228372776	3.97888467465318e-06	5.21793883555999e-05
FGF5	3.50496672940625	1.45212373417501	0.537877262331967	2.69973065579929	0.00693956328442539	0.0249812989807782
LOC100192378	3.22005249791756	1.45282955340566	0.404150552750849	3.59477314460411	0.000324674357658494	0.00210627879369219
SH2D2A	50.850049477827	1.45359475567455	0.179426043962137	8.1013587747679	5.4348711031268e-16	8.44025947454008e-14
FBN3	1.77677731454659	1.45492088536761	0.368681437373978	3.94628190594741	7.93741542627122e-05	0.000655734963633717
MAP7D2	165.975274602887	1.45498246833998	0.248068099337844	5.86525422746294	4.4844506084596e-09	1.36883988917532e-07
DGAT2	96.5677495269945	1.45569763283961	0.206542735370095	7.04792463521515	1.81605947207497e-12	1.26580775171714e-10
PRR11	16.6620555724122	1.45653979739504	0.225473206607998	6.45992408280838	1.04755520589217e-10	4.7798756095657e-09
CYP2C18	15.4318689200549	1.45677649755401	0.263571343272829	5.52706709107623	3.2562846138328e-08	7.91885478067252e-07
COL24A1	6.1667019317422	1.45751794840027	0.19587339105299	7.44112276080399	9.98331168511968e-14	9.30234474070309e-12
CREB3L3	23.9139052811033	1.45767372222055	0.344610528539364	4.22991638821633	2.33778186027275e-05	0.000235695273657567
PDE3A	41.012782201264	1.45784254749731	0.234774818532973	6.20953540335742	5.3141476761381e-10	2.08145288624666e-08
MT3	20.2644911235224	1.45981730812547	0.321064060972021	4.54681007804448	5.44651046508224e-06	6.76192295047798e-05
ATP10B	3.45073961426769	1.46060495933837	0.319401907864906	4.57293749151976	4.80933650682081e-06	6.12233053725086e-05
C6orf218	1.08197905559339	1.46149042722186	0.36124502672693	4.04570393802714	5.21661284412366e-05	0.000460852863235356
TMEM233	9.71275060110665	1.46165663814734	0.221593062485956	6.59612995889696	4.2202901907672e-11	2.1470119981995e-09
THSD7B	8.310293560346	1.4619972014891	0.25979342251656	5.62753740001214	1.82800536910845e-08	4.73143377992632e-07
SULT1E1	1.00491091502156	1.4632708058601	0.438822300258993	3.33454066713674	0.000854404059821972	0.00465283588898437
NKX2-3	2.02424935237253	1.47248105084034	0.573040454474294	2.56959354150868	0.0101817899299796	0.0339565515827071
WNT3A	1.53155358785911	1.47343759829121	0.35282056350611	4.17616701149477	2.96462192583097e-05	0.00028506151523804
LOC100129066	1.35548509297694	1.47977651326533	0.295225865014941	5.01235389111465	5.37681996362781e-07	9.33247261137909e-06
KCTD8	8.81656630991727	1.48008547682213	0.374480992257946	3.95236475928433	7.73826646202219e-05	0.000642581001142781
STC1	412.674882927834	1.48032084124477	0.200927062438264	7.3674537580004	1.7391773159484e-13	1.48250506757714e-11
PLXNB3	61.214042089087	1.48096618380514	0.227839352955797	6.50004560051775	8.02956686522878e-11	3.79081204752028e-09
CRABP1	1.78241846366452	1.4809926901435	0.490620567738403	3.01861109690199	0.00253936276730312	0.011249771449868
GDF1	7.00963387299229	1.48421892709609	0.372820418793939	3.98105589789714	6.8609810926115e-05	0.000581459115670627
KISS1	2.77802950450697	1.48477531120123	0.371058693268386	4.00145674562406	6.2953704417425e-05	0.000540779559992458
BCL2L14	2.60978287220478	1.48673767665104	0.271812613773556	5.46971553678384	4.50758453985891e-08	1.05838563254194e-06
IL27	1.03470932851622	1.48755416456301	0.314699423656321	4.72690463579479	2.27968261904932e-06	3.24433288485926e-05
SLC22A6	1780.5068735605	1.48880414985675	0.478125140753597	3.11383782812628	0.00184670962547408	0.00871147007977436
ERN2	3.24197209614909	1.49133327636713	0.323162286746752	4.61481223994378	3.93450849897808e-06	5.16739899598724e-05
C5orf46	1.92983190825997	1.49213358172012	0.580291971222516	2.5713496924257	0.0101302979063224	0.0338409269449605
SERPINB5	2.35729286194426	1.49218079690281	0.510010088416591	2.92578682420876	0.0034358628636495	0.0143938750918246
BIRC5	83.0381848472557	1.49326821798653	0.177879150135418	8.39484682071912	4.66502026568598e-17	8.88059341760264e-15
TNFRSF9	15.60748634344	1.49520530045815	0.237842393307107	6.28653823932688	3.24623084912781e-10	1.34593140405056e-08
NETO1	2.60231624455373	1.49523424459708	0.377381582294467	3.9621282933473	7.42846032552767e-05	0.000621225609840066
EPHB1	105.012807005312	1.49601120060384	0.218878230935105	6.83490173605886	8.20612582163176e-12	4.99248287100236e-10
COL1A1	6282.09490115593	1.49696604395399	0.202040104786524	7.40925196775012	1.27013784975518e-13	1.141447740714e-11
GABBR2	10.9943764924758	1.49770890217647	0.220934033886743	6.77898681261682	1.21021572405715e-11	7.02480628810089e-10
C12orf36	59.2932594676463	1.49867977404955	0.328627292634227	4.56042394420851	5.10504501388434e-06	6.41445826300981e-05
KIAA0319	42.2816051546149	1.50036740851052	0.194709928058553	7.70565437248441	1.30174508484012e-14	1.486844837549e-12
DNTT	5.5205183329969	1.50051981483747	0.420161975746674	3.57128893487062	0.000355228751224776	0.00227120614361987
GRIK1	3.00872816477979	1.50102883488253	0.345873076392023	4.33982561042484	1.42595832635858e-05	0.000154404686298791
ISM2	13.5110175825073	1.50617335859702	0.246534228456196	6.10938841242743	1.00013654547916e-09	3.61355457166594e-08
LRP8	75.5252210683454	1.50629133504291	0.150370784890572	10.0171807717773	1.2810498495831e-23	7.31603436678036e-21
LOC90246	24.5552338328053	1.50631963183222	0.236939082007355	6.35741313366556	2.05179628431941e-10	8.83657933510127e-09
SLC39A2	0.899494536008608	1.50650483198523	0.397310543799068	3.79175648745712	0.000149585551450664	0.00112357344203757
VEGFA	2112.31129791998	1.5071089952687	0.161139251106375	9.35283604038713	8.53284530590563e-21	3.21415943182454e-18
EPN3	100.956438792265	1.51013996955637	0.260757195173803	5.79136452418815	6.98168624662525e-09	2.0130907705253e-07
KCND2	15.0870175982676	1.51142735093135	0.340058295417186	4.44461250115107	8.80504238035552e-06	0.000102555572566983
KIAA2022	17.8542772202259	1.51384342940364	0.252275355816374	6.00075827662506	1.96398182051168e-09	6.63894551840086e-08
PI16	6.19447557802014	1.51533019777449	0.335093907941421	4.52210607791591	6.12273603694849e-06	7.49632910083929e-05
CALML3	8.44524706284053	1.51613691599853	0.316434087757132	4.79131981874908	1.65687774499609e-06	2.4608526507895e-05
ATG9B	22.6623217609367	1.51646299888122	0.184168466624741	8.23410775293659	1.80900811637047e-16	2.99314763478717e-14
DMBX1	0.676799210915511	1.51685538421036	0.464006375190135	3.26903996435135	0.00107913058528706	0.00565736685872731
MEGF11	132.698020597169	1.51790895212576	0.240458736239038	6.31255481030565	2.74466205741845e-10	1.14904275975867e-08
COL2A1	1.1927114764292	1.51874917090965	0.41558158129098	3.65451511636233	0.000257668482643469	0.0017538496027374
DLL1	74.5638999746176	1.52011720845692	0.181000555999394	8.39841181737591	4.52557625148478e-17	8.70878282133549e-15
NEGR1	34.9625640356787	1.52094958740002	0.221710637573296	6.86006591315314	6.8828782779465e-12	4.27559568536017e-10
SNX31	0.931351360048584	1.5236902558462	0.413437183962411	3.68542142543407	0.00022832451801068	0.00158644319735521
GABRB2	6.6775583659094	1.52498901118883	0.288210185200533	5.29123913552105	1.21490386617187e-07	2.53639835456447e-06
PDE10A	153.923597398482	1.52914602237887	0.251422750137028	6.08197158588662	1.18713610131705e-09	4.18666484815079e-08
C3orf57	7.71819673770404	1.53024381045548	0.284470428134709	5.37927200549241	7.47876408359636e-08	1.63260221129457e-06
SH3TC2	52.962087381399	1.53315583664813	0.206907015485395	7.40987845700354	1.26415220679768e-13	1.141447740714e-11
TRPV3	4.11901210840864	1.53360273352919	0.244134799145148	6.28178669693621	3.34703868626464e-10	1.38125810959508e-08
MS4A1	21.4602874930804	1.53405428955714	0.247333957321805	6.202360186075	5.56225938353341e-10	2.1642690137599e-08
C20orf54	113.906840832686	1.53448843892827	0.251921432373525	6.09113890974184	1.12110217029453e-09	4.00161145622872e-08
IL15RA	115.880014267779	1.53731275667495	0.172398653669292	8.91719699635203	4.78238530393872e-19	1.38798933476936e-16
ANGPT2	149.241716365027	1.53745515857518	0.185546698799842	8.28608198647451	1.17040118679917e-16	2.07207826110924e-14
ARL9	1.78417090740445	1.53803570549258	0.288497429438796	5.3311937942895	9.75692285929107e-08	2.07118180216893e-06
RAB27B	12.8069646307869	1.53892640984773	0.304367490118591	5.05614580994877	4.27814290011482e-07	7.6815661159871e-06
NMNAT2	27.2875195325098	1.54305867466277	0.213244708465641	7.23609362110568	4.6179260670931e-13	3.6175116412308e-11
UMOD	23.8090290088394	1.54446644285139	0.319397801580373	4.83555752484646	1.32772969749833e-06	2.06108155751769e-05
GBP6	1.12197494769856	1.54655646867587	0.346081492210792	4.46876387060273	7.86729193954547e-06	9.33529064998076e-05
GSTA1	480.530915856446	1.54854768479391	0.340570357801861	4.54692444400825	5.44355289945271e-06	6.76192295047798e-05
CNGB1	2.93506891529254	1.54989029684745	0.31258357251086	4.95832293552025	7.11043011733905e-07	1.18422441013519e-05
PLAC2	9.04027994529291	1.55136591887008	0.214013722903853	7.24890861118771	4.20143238724765e-13	3.36570855130463e-11
CLEC2L	0.558697264824649	1.55313094626259	0.435009830551556	3.57033528252303	0.000356524590694537	0.00227620315674579
GABRG3	2.28988555647329	1.55569703447835	0.533945565913615	2.91358732760792	0.00357301886371428	0.0148350670645398
COL5A3	68.4765626748015	1.56110812269762	0.220283350732368	7.0868184885851	1.37230178800582e-12	9.87611010359963e-11
VGLL3	48.3035930569964	1.56361077604229	0.238771828351782	6.54855636377098	5.80959306992026e-11	2.84911456260023e-09
LOC400759	5.58938809944498	1.56373785357041	0.197429944315134	7.92046950625886	2.36615402476042e-15	3.22233775802758e-13
CPT1C	19.2910016541167	1.56380733299085	0.193291986387385	8.09038885790512	5.94745480106709e-16	9.07704653431825e-14
CCL20	52.1622263665766	1.5640433492611	0.232437207692268	6.72888546885227	1.70967556082011e-11	9.57851143315163e-10
NKX6-1	0.663175505863201	1.56851026150259	0.596535558134652	2.62936591140899	0.00855442601366667	0.0297072495382414
CD1A	7.19913682979295	1.56890908579976	0.317217877645742	4.94584068667109	7.58159467584828e-07	1.25209470280987e-05
PAX9	6.6182020378839	1.57426274014203	0.220531485642276	7.13849424066202	9.43588233613323e-13	6.96053586995428e-11
CXCL17	2.27551038115449	1.57542466923761	0.354513429097672	4.44390688738497	8.83398485463967e-06	0.00010282502818313
NEB	67.625504100115	1.57595426733477	0.221054797928293	7.1292470559539	1.00919451567083e-12	7.4136015375255e-11
CHRM3	5.84912268185924	1.57670997620989	0.247684275509206	6.36580571361822	1.94267214158447e-10	8.42967343005181e-09
GJA3	2.36358402267704	1.57743570908394	0.269226926044755	5.85913055673234	4.65296792349127e-09	1.40813921568358e-07
FN1	17793.4069592697	1.57779914576783	0.218237854605985	7.22972258234691	4.8398166441102e-13	3.7746305668426e-11
SLC13A5	0.895710317322729	1.57971395096061	0.43121983437034	3.66336106331307	0.000248927263014791	0.00170417952993575
TMEM200C	6.39949353178895	1.57975803615423	0.294254875128409	5.36867243224039	7.93183331206081e-08	1.72089677643045e-06
PCSK9	1.33929984376463	1.58037715756256	0.357485289534405	4.42081731424774	9.83282783774404e-06	0.000112965855963284
MARCH4	3.57152009333784	1.58088187093413	0.251110853897639	6.29555372217622	3.06304451211032e-10	1.27595623629179e-08
DNAJB3	1.79086840001845	1.58239611489504	0.345387154863636	4.58151408531621	4.61621506280373e-06	5.91356522951354e-05
UCN2	2.24501348848259	1.58375729655026	0.321731474290694	4.92260603362447	8.53992653440038e-07	1.3959265350585e-05
SLC6A15	38.6135791063676	1.5843032993005	0.380924669994086	4.1590986987666	3.19505827476544e-05	0.000303136718630479
CALB1	7.56893380284316	1.58486260508992	0.254121407446457	6.23663555548285	4.47081911379185e-10	1.79481590908324e-08
NOTCH3	1218.75230061902	1.58582738102833	0.190784803587604	8.3121262868306	9.40023084222592e-17	1.68102713970472e-14
MEOX2	3.40632059336917	1.59367714509962	0.326341633827555	4.88346254324922	1.04238958661712e-06	1.67160011245194e-05
WNT10A	36.5375810861456	1.59495802759264	0.25757019679467	6.19232367502561	5.92836527819525e-10	2.28164736706889e-08
LOC100144604	0.807786593040851	1.59592128354643	0.462056247624664	3.45395456018771	0.000552430447551364	0.00326202468134095
EMILIN3	18.5485944906104	1.59616491961368	0.240675590679894	6.63201829111382	3.31127534717821e-11	1.7395495176986e-09
IL6	49.0178471155151	1.59894147703845	0.291230504422229	5.49029532538352	4.01262237559057e-08	9.53549886408799e-07
TNR	0.685240938242059	1.60071403153318	0.601159190540079	2.66271240084529	0.00775136326277923	0.0274295692992691
ABCC8	4.36698865936152	1.6018038296117	0.331614975387135	4.83031210439673	1.36319201932137e-06	2.10592945114009e-05
MYH2	1.12106757541277	1.60229113766673	0.487074718084202	3.28962082854346	0.00100322472741337	0.00531769178866055
C16orf11	0.751656898336956	1.60234391099577	0.511249640857419	3.13417122075328	0.00172340262635087	0.00825517318639495
GPR19	7.02832216810458	1.60263842801045	0.186325945869253	8.60126280606696	7.88437095118797e-18	1.7448112914979e-15
ALOXE3	5.12238854545944	1.60309313970267	0.234376092089782	6.83983219196511	7.92859997730063e-12	4.84027358614242e-10
GRIN2B	2.42816062446426	1.60696000647124	0.376058059904578	4.27316996444378	1.9271344544409e-05	0.000200930438053131
TIGIT	27.1963175802869	1.61123659201445	0.205580682698055	7.83749022947327	4.59640701368148e-15	5.65102706737617e-13
FAM171B	105.057261963512	1.61217830487241	0.221334946837423	7.28388502542527	3.24341462562202e-13	2.6583987283339e-11
DLX6	1.17121511934993	1.61234033241872	0.350317259390075	4.60251468975839	4.17420111628895e-06	5.41392355771279e-05
SNCG	714.051839020674	1.61359418778831	0.251371551790598	6.419159910078	1.37028412150248e-10	6.09535429323615e-09
STAC2	14.9274678600221	1.61884465538282	0.317306501925192	5.10183259895657	3.36380228358279e-07	6.20988067033887e-06
MMP1	24.1562767445362	1.62061627405454	0.29308217282359	5.52956277907088	3.21029900513539e-08	7.8177625291495e-07
NEIL3	20.985947191647	1.62075509668667	0.218004596677577	7.43449964536174	1.04964509886165e-13	9.72927582735428e-12
ADCY1	45.2648254576726	1.62097660435347	0.22753498716383	7.12407627749277	1.04781007257252e-12	7.63392161515388e-11
C6orf176	2.07659834283044	1.62195384182069	0.452328566222783	3.58578688798053	0.000336063323786717	0.00216903575804595
KIF25	1.07493584657204	1.62287970412152	0.41337572704211	3.92591920124086	8.63991565446658e-05	0.000704889708510029
GPR88	2.00991299162392	1.62296925648644	0.28473346926794	5.69995954693754	1.19835861348236e-08	3.26396013739873e-07
LOC284578	3.2250452837209	1.62598823922249	0.321389527409984	5.05924462544258	4.20920586073572e-07	7.57314843073834e-06
DIO3	1.90403527166791	1.62931454991534	0.389741649045509	4.18049893796463	2.90870170133175e-05	0.000280853326716336
ANXA8	5.83411434651266	1.62951033860184	0.272355038568287	5.98303724127093	2.19014666347183e-09	7.31591632643497e-08
SLC7A10	0.6650074890666	1.63203309519509	0.453733085324575	3.5969012355086	0.00032203068550559	0.00209219495640036
DEPDC1B	37.6857912160207	1.63293462069287	0.169767291247054	9.6186645183408	6.66913834362215e-22	3.10711645356544e-19
GRID1	58.7304983936292	1.63347301772689	0.275387483381458	5.93154415614546	3.00098830592697e-09	9.67750400148106e-08
SLC27A6	0.530330794319697	1.6343440764582	0.566641352744481	2.88426545034595	0.00392327893140695	0.0159465164063593
BTBD11	203.812126308594	1.64132174456707	0.255809806256164	6.4161799290973	1.39736283031753e-10	6.18472788698537e-09
SPINK2	2.40982944844037	1.64172387632762	0.335036737094489	4.90013092464128	9.57728117870787e-07	1.54704549258982e-05
VAT1L	5.00696497977818	1.64267426867875	0.248946214835009	6.59851072556954	4.15308439896277e-11	2.12503486124962e-09
PCSK6	108.863459739051	1.64393151169547	0.217349374513135	7.56354378924664	3.92233687763235e-14	4.03727046986065e-12
UGT1A1	16.5050826660465	1.64396856749557	0.373472572507762	4.4018455129296	1.07333973399728e-05	0.000121576498085015
CRYBB3	10.0627352180858	1.64415464677911	0.249901523181096	6.57921018587647	4.72953801762523e-11	2.37874264386469e-09
ABCC2	514.391257533659	1.64566851526291	0.290798032447174	5.65914597638091	1.52128118219325e-08	4.01981523127601e-07
KIF14	26.47108975335	1.6459572301585	0.187167508435747	8.79403291690208	1.44285275921102e-18	3.81257690284655e-16
SPATA21	0.699292072179809	1.64675670185624	0.587784186034346	2.80163492142679	0.0050844375409584	0.0195599483322745
APLP1	50.6477000719345	1.64899914063987	0.23924048485014	6.89264252943142	5.47653742334367e-12	3.47514761802424e-10
PRRX1	47.8098154474692	1.64906372040917	0.245972968834883	6.70424773998707	2.02446550685385e-11	1.12354662486961e-09
CA4	25.3264621181271	1.65046200103618	0.297852736505926	5.54120140173145	3.00403470826123e-08	7.37634264563895e-07
PDGFRL	43.2573929603835	1.65139284535809	0.254515571005791	6.48837648255524	8.67662465240131e-11	4.063782085876e-09
LOC148145	2.43711816419443	1.6514347542541	0.49736475793397	3.32036946307592	0.000898983894516025	0.00485232038674137
PITX1	44.6081374784128	1.65166856445663	0.432127747035946	3.82217660352931	0.000132278897161208	0.00101204217603372
KRT6C	2.40896214677438	1.65584489928581	0.644427431576277	2.56948233137064	0.0101850585490526	0.0339565515827071
UCA1	41.7113872255442	1.66030650543113	0.370599835558888	4.48005192157543	7.462488382672e-06	8.90268829695587e-05
CRNN	0.822795404875681	1.66152774680911	0.554657199218694	2.99559394369998	0.00273910913472661	0.0119470776351811
GNAO1	39.723105041226	1.66164279060093	0.198405110658988	8.37499994371065	5.52238982095977e-17	1.04008924883268e-14
TREML3	3.2386772593369	1.66298947355306	0.319998775354977	5.19686199332575	2.02680714709952e-07	3.97370916193243e-06
ATP1A3	38.3581661641085	1.66457621533029	0.26426815031018	6.29881509889302	2.99929507397618e-10	1.25234716956779e-08
HECW2	59.5730933041754	1.66571281496617	0.213056067775315	7.8181899833184	5.35882721750295e-15	6.49812856566249e-13
FETUB	2.02761927304984	1.66693546472968	0.463109535260358	3.59944103459786	0.000318901933020769	0.00207873336605291
NDUFA4L2	279.475189952955	1.66818011645974	0.190986746418069	8.73453340478456	2.44663949235318e-18	6.10074726374941e-16
FLJ42875	2.71800817252144	1.66966883561225	0.349284821586862	4.78025019245513	1.75077178980633e-06	2.57653065392612e-05
GSDMC	1.98698813776235	1.67154064041443	0.473132504347259	3.53292285999354	0.000410992373994985	0.00255856010925565
COL4A6	59.8496704258086	1.67570202215476	0.253926503082743	6.59916157553955	4.13489479852735e-11	2.12186021777183e-09
PRRX2	9.38294942926851	1.6762721344826	0.306639856085229	5.46658270677209	4.58794405884103e-08	1.07440425420267e-06
DLL3	11.2211852227872	1.67908389753623	0.281129620390568	5.97263246470972	2.33455448343155e-09	7.72541169620042e-08
SCUBE3	11.182019932025	1.67947422217123	0.21365721581187	7.86060145822569	3.82293325168505e-15	4.73295176837986e-13
FAM3B	24.2260328864237	1.68007323029056	0.294509202049235	5.70465445086394	1.16579343961721e-08	3.18015517025933e-07
GDF6	10.1907737515447	1.68074578419627	0.302524131863616	5.55574120266871	2.76436191577119e-08	6.92224375626778e-07
TMEM105	2.36359652958641	1.68478696628955	0.540319372391824	3.11813170575677	0.00182001451862799	0.00860847903761419
NCRNA00158	1.01050498638746	1.68646211215359	0.321975899079309	5.23785201617897	1.62456238744327e-07	3.29076115644114e-06
STC2	193.155689585529	1.68772280201397	0.223813529136038	7.54075416499126	4.67261240270268e-14	4.69368860188173e-12
PSG1	1.21707953548881	1.68896302302713	0.492185493075715	3.43155791218599	0.000600124980937081	0.00349149282369704
DES	68.7572082327014	1.68970905001089	0.306399591835474	5.51472356698897	3.49328587909592e-08	8.40287135917313e-07
CREB3L1	123.944158945553	1.6899971164928	0.276656678710003	6.1086438410702	1.00481276373945e-09	3.62305604261574e-08
CAMK2N2	33.5046356058181	1.69085888303422	0.204486501478512	8.26880439935493	1.35309050006558e-16	2.34854060913343e-14
KLHDC8A	3.64296689197031	1.69473078525035	0.276829860447781	6.12192190000412	9.24533406501733e-10	3.36482393554002e-08
SHISA6	4.63540315269559	1.69643184799253	0.435819187340956	3.89251298994633	9.9211185671045e-05	0.000790830630851049
GLP2R	0.635057816852889	1.69886792019612	0.598161189983498	2.84015069624124	0.00450922266122014	0.0177908196258813
LRP1B	24.863448797815	1.70089403112993	0.319131965387772	5.32975137436704	9.83473091631422e-08	2.08519851667577e-06
CYP2J2	81.9436346176956	1.70279669681813	0.175936971205682	9.67844725954416	3.72327620174501e-22	1.83102449654705e-19
SLC6A11	0.639011212512618	1.7078758881278	0.673418094410994	2.53613008367646	0.0112085090041852	0.0365982005551633
TBX2	442.073848707473	1.70815813572122	0.187378138366022	9.11610154000213	7.78752872536981e-20	2.55315571396198e-17
ABCA17P	20.3085415367243	1.71000725177934	0.19975070689146	8.56070688505006	1.12177574796503e-17	2.39276118577988e-15
SCRT1	3.20068813065806	1.7110383737182	0.315683416608445	5.42010851282844	5.95628703578513e-08	1.33144072830227e-06
LOC285548	0.601398867990106	1.71207246834165	0.54825163325768	3.12278589699516	0.00179148017498438	0.00850989133832128
DPYSL4	27.1912315176577	1.71296129011097	0.278645990080988	6.14744640543041	7.87402925957594e-10	2.94096654032769e-08
ALDOB	551.186826876677	1.71326795999332	0.300180896416538	5.70745167479262	1.1468016573462e-08	3.1477483010321e-07
UPF0639	2.2228320210676	1.71786682105737	0.359778658425116	4.77478800042534	1.79896663927553e-06	2.63868313021822e-05
NPBWR1	4.97315755092363	1.7193953084	0.45194409073418	3.80444250439664	0.000142123917497762	0.0010733537274171
LAG3	41.0153084907486	1.71981117710668	0.190162048054478	9.04392435137208	1.51145878132031e-19	4.77836897580264e-17
LGALS4	69.0497086696761	1.72103824634098	0.292498110919293	5.88392944122587	4.00638691723206e-09	1.24001877592092e-07
GBP7	1.7422383631785	1.72223184340773	0.366416589883735	4.70020160373797	2.59904776314451e-06	3.60325306176276e-05
GJA8	0.926135900152846	1.72283900145411	0.415866223211405	4.14277213511111	3.43132831777316e-05	0.000321930241324092
CAPNS2	1.20750815514039	1.72503073642862	0.35479342675252	4.86207073287152	1.16164095657012e-06	1.84115411773657e-05
CACNA1B	1.68516208154043	1.72705522937277	0.423622193036889	4.07687618297744	4.56447825833151e-05	0.000411035214066639
FMN2	2.96030915259956	1.72943948354447	0.322286597318599	5.36615390752603	8.04333145908451e-08	1.74201534019291e-06
UGT1A3	7.75875122614742	1.73028737452634	0.400003960491851	4.32567560680837	1.52065068802793e-05	0.000162865092443112
SCGB1C1	0.628195697877081	1.73072998493655	0.691318452555306	2.50352059682377	0.0122964522975321	0.0394806658461205
TEX15	9.97293203990474	1.73633925503338	0.343306488063678	5.05769426271756	4.24356057056429e-07	7.62720775038276e-06
CBX2	35.981527218224	1.73703848176734	0.175795153410981	9.88103737824	5.03093626789739e-23	2.69902108141986e-20
PSG4	17.5662142413812	1.73764018844581	0.404809629536733	4.29248728701038	1.76682669603987e-05	0.000186189879920773
REG4	0.829079884656627	1.73786808006911	0.532983928043688	3.26063880846828	0.00111161542544554	0.00579847952035588
FABP6	82.7116660174618	1.74042529482116	0.363310907888171	4.79045703564967	1.66401852469945e-06	2.46525388797315e-05
CSMD2	5.76568560207399	1.7416498266172	0.253999102093747	6.85691332079742	7.03642946845961e-12	4.35569745837793e-10
HOXC13	12.1619383936325	1.74186068215039	0.299551967188271	5.81488647362349	6.06750497909502e-09	1.76967229242007e-07
TMEM45B	112.832226115313	1.74422494188553	0.204338458115185	8.53596018084034	1.38996229350051e-17	2.92951100525393e-15
GJB4	48.721698071142	1.74619614380806	0.272067863077304	6.41823743553244	1.37861125417696e-10	6.11702597592704e-09
FOXA2	5.77300680630392	1.74715868292953	0.416146987405099	4.19841723191128	2.68787059217798e-05	0.000264220216346024
COL7A1	129.500001845759	1.74776811350037	0.243382583582578	7.18115523211777	6.91248110477656e-13	5.27493816719673e-11
IRS4	0.873084726036404	1.7480738185986	0.626653800576194	2.78953676973041	0.00527835024288247	0.020126623454661
PCSK5	181.580794411045	1.74835769581908	0.217107488551341	8.05295896279336	8.08160068924184e-16	1.17275949674047e-13
FAM151A	63.5513083650546	1.7685982854426	0.310484395822267	5.69625497847889	1.22467682028668e-08	3.3305189595016e-07
BMPR1B	45.6340912142515	1.76964609829638	0.308969956611831	5.72756690554107	1.01881261836317e-08	2.8271251717087e-07
C20orf114	0.97436466383743	1.77257574857208	0.722525692642638	2.45330479818494	0.0141550341832383	0.0440577927531735
OXGR1	1.25149810723758	1.77541332235612	0.380838854716489	4.66184923194827	3.13380737326845e-06	4.24490633024825e-05
EBF2	1.72394160706053	1.77946446946455	0.393780323255792	4.518926834007	6.21538671583081e-06	7.56789590213678e-05
PLA2G4D	0.911348816742922	1.77997652112938	0.434661641567505	4.09508535124081	4.22012889215436e-05	0.000384524765345861
SALL4	5.23099630794141	1.78096196800793	0.297118734954454	5.99410861210397	2.04604597858632e-09	6.86045416759321e-08
OTOF	4.72900646464453	1.78448974590663	0.236686613430938	7.53946207619942	4.71914014423265e-14	4.69368860188173e-12
FAM5B	9.12036015934682	1.78660954423904	0.311321271517263	5.73879688828126	9.53514922613074e-09	2.68124874829437e-07
CCDC155	1.09901230388585	1.78669367232746	0.373807081207452	4.7797213112073	1.75538348822424e-06	2.5811718667377e-05
STRA6	43.5506254860981	1.78719825372552	0.303280752663285	5.89288386431085	3.79513145214285e-09	1.18082613758764e-07
C9orf140	90.0136413214742	1.78737371219374	0.159923576056121	11.1764241162698	5.3190269805417e-29	6.27787024423402e-26
GRIK3	12.2546430382244	1.78937572103263	0.288843856859735	6.1949585512617	5.83003701778054e-10	2.24869227369906e-08
NLGN4X	77.9100829588531	1.78950249833574	0.242319146871255	7.38489930094756	1.52568814114049e-13	1.33716746785897e-11
DEFB125	0.681561263085304	1.79247454203035	0.493980785476772	3.62863211430444	0.000284926928345341	0.00190137442119333
BEND4	1.68988062305279	1.79363851626199	0.303989266262999	5.9003350292974	3.62764180955322e-09	1.14074192888686e-07
MEOX1	3.07606701990979	1.79472213200425	0.289998205524497	6.18873530185567	6.06488251336395e-10	2.32487688168719e-08
NOTUM	3.57262749515949	1.79489509397559	0.307682029936865	5.83360391357239	5.42427991894338e-09	1.60319618839689e-07
NUDT11	11.6684446193971	1.79658409078154	0.236463698517838	7.59771627544773	3.01402236210615e-14	3.21447300594743e-12
CA9	423.916016929971	1.79678233630723	0.308370694539067	5.82669614242347	5.65354122621843e-09	1.66539590464178e-07
UBD	840.822204626041	1.79807920876876	0.238335581477333	7.5443171247167	4.54663543203116e-14	4.62607090164826e-12
FRMPD4	0.774528451207763	1.80057987800944	0.378931378668012	4.75173073377742	2.01682838330511e-06	2.92192550720406e-05
FCRL1	3.1056201589603	1.80119498917323	0.31392875668071	5.73759157401813	9.60323581303084e-09	2.69438489435655e-07
LYPD6B	21.0664212836814	1.80485595308347	0.291053876268134	6.20110605027897	5.60677152190862e-10	2.17204120402342e-08
PTPRQ	0.579345174346598	1.80589060422802	0.662738264376493	2.72489261794324	0.00643224031982363	0.0235915439449259
ADRA1D	4.64266141868772	1.80618100118718	0.314307473819826	5.74654168810048	9.10871814820421e-09	2.58017193753292e-07
GPRC5A	473.197102255551	1.80834350560136	0.228903573756154	7.90002303558505	2.78851889798234e-15	3.68417452014025e-13
NR0B2	6.13033515073453	1.80921389609659	0.411921427187457	4.39213349120889	1.12243743909592e-05	0.000126409875456451
TWIST2	2.71317753030792	1.81079926880657	0.303738543992105	5.96170392142802	2.49621144830175e-09	8.18387545939521e-08
LOC286467	2.48514408296445	1.81180757948265	0.276624732570112	6.54969482536575	5.76547798530991e-11	2.8353339514424e-09
ANXA10	0.671779199934844	1.81702744623884	0.658592025953314	2.7589575558688	0.00579860657635802	0.0217198324985945
PLD5	8.82910931824658	1.81778660553967	0.452848677605489	4.014114858746	5.96692868777935e-05	0.000516822433896505
SORCS2	119.822236965209	1.82110536891484	0.283464764655064	6.42445057018239	1.32346656561133e-10	5.93181065255268e-09
DUSP4	110.694206205777	1.82370597826308	0.235214873616488	7.75336164003213	8.94912880650623e-15	1.03552533588488e-12
ASPM	68.7152948785308	1.82440522690633	0.196477068534672	9.28558859572142	1.60815840387251e-20	5.81037477186915e-18
NCRNA00230B	6.45643221967293	1.83117540551289	0.613163225001589	2.98644036505638	0.00282245881473303	0.0122371493058842
TBX18	20.9318908373549	1.83459620216767	0.304164700513433	6.03158814639191	1.62356125672932e-09	5.60302699593293e-08
GSTA2	107.62020521683	1.83464581723718	0.35672001975555	5.14309743112935	2.70245377750013e-07	5.11703119538634e-06
CYP2B6	3.56488056396867	1.83803113555503	0.393980927069502	4.66527948250342	3.08197855003415e-06	4.18751713352299e-05
F2RL2	42.8456728913643	1.8437051863905	0.261414183674352	7.0528123626499	1.75337224451024e-12	1.23181358003212e-10
IGLON5	9.42392928773174	1.84610160187707	0.246473918682045	7.49004848768022	6.88481743265582e-14	6.69718724328234e-12
POU4F1	1.56586472720667	1.84799406606824	0.37284177291542	4.95651024191289	7.17705857836369e-07	1.1930764795432e-05
UGT1A8	32.9839917642102	1.85178182673188	0.483522260395577	3.82977574851862	0.000128260087997598	0.000985126506685241
PAPPA2	19.4472951301959	1.85238843433032	0.389630871091621	4.75421372321069	1.99220207043608e-06	2.89097913565577e-05
PSG8	0.676537650229763	1.85936878201217	0.608699883021791	3.05465605280164	0.00225318759677482	0.0102126045092938
DLX2	0.812653872322626	1.86014209687815	0.392469481364119	4.73958405737127	2.14157380471341e-06	3.07248157525496e-05
MMP16	10.2525233087425	1.86019401170224	0.247188012753779	7.52542160511303	5.25504768045993e-14	5.19750637624931e-12
KCNJ1	24.5404335403643	1.8612873098999	0.287385246033561	6.47662792571662	9.37950985720202e-11	4.33563557472336e-09
MAGEL2	5.69239823307504	1.86271156164448	0.3132618455353	5.94618076919482	2.74471029800539e-09	8.88342799193553e-08
SFN	1449.25976249003	1.86736055595476	0.25307953065096	7.37855231180339	1.60019917705717e-13	1.39556286850346e-11
INSM1	2.28021550562844	1.8695873099711	0.387451080877458	4.82535061132635	1.39757188159052e-06	2.14779623191654e-05
C1QL2	0.990060899829975	1.86993953472119	0.516529256124015	3.62020062281279	0.00029437467771931	0.00194753710550922
SLC38A3	37.0072246807786	1.8709848053358	0.390656448294526	4.78933552358827	1.67334488657205e-06	2.47492881135101e-05
PCDH17	54.6542127797257	1.87954566451135	0.200330396970917	9.38222902230966	6.45924962495135e-21	2.48596859478562e-18
CD19	6.9585642536722	1.88113757177065	0.308854477102043	6.09069225552827	1.12423481597184e-09	4.00471895009365e-08
NELL2	30.0303244317664	1.88236489587067	0.207998668345359	9.04988916921915	1.43113523428075e-19	4.60669421594663e-17
TWIST1	7.66113290696138	1.88574097106836	0.254552129785095	7.40807383014393	1.28146961527081e-13	1.14574505387859e-11
ELSPBP1	9.53121482153295	1.89656880085041	0.487876220358685	3.8873975031127	0.000101324750463914	0.000802618962958893
SOX11	8.31067519929702	1.89688728282467	0.350105369478914	5.41804681729943	6.02536403146006e-08	1.34348922938248e-06
IGF2	399.432218492052	1.89910130092936	0.230185830075347	8.2502962945535	1.58002288945584e-16	2.66406906999296e-14
TUBA3E	1.60146146236652	1.89938403052272	0.315769685008987	6.01509302727607	1.79783425725414e-09	6.10918573712616e-08
C18orf2	1.28908543968641	1.89970156139621	0.699057896580261	2.71751677606306	0.00657738209033524	0.023945295605037
OGN	20.7806528184351	1.90065964242966	0.380022938327574	5.00143399446936	5.69054499625689e-07	9.8001370246821e-06
ABCA4	5.86937728998589	1.90231443991282	0.235338803777957	8.08330122093957	6.30366662655118e-16	9.45763677597136e-14
GDPD2	2.03043391196215	1.90354362731271	0.367933592546621	5.17360650365598	2.29618139238722e-07	4.43164907142635e-06
UNC13C	2.30292645211684	1.90553131329677	0.349059848023583	5.45903897021128	4.78718687763268e-08	1.10642763030821e-06
ACTG2	89.8514611143536	1.90872786251123	0.275624799455337	6.92509478930442	4.35683694607207e-12	2.84625244624575e-10
FZD10	5.90830635223942	1.91270493620157	0.28230367201691	6.77534557923498	1.24109240179393e-11	7.15710093855365e-10
BMP3	3.24467328939497	1.91403047740984	0.275997114061342	6.93496554817031	4.06320170256433e-12	2.68413891575369e-10
GTSF1L	0.41859497058528	1.91893113747828	0.739408631005501	2.59522415212923	0.00945292478990093	0.0321094743822729
KISS1R	4.44833229951039	1.92580518521976	0.338128122539317	5.69548954034674	1.23018427663496e-08	3.34036540391798e-07
INSC	4.66097882692724	1.92646802159769	0.300688345178304	6.40685963553167	1.48547458151348e-10	6.55831471100114e-09
PPP2R2B	30.6087237941547	1.93018006827914	0.243943015598755	7.91242193813805	2.52429153366661e-15	3.41145475664378e-13
ARX	22.6681754396339	1.93210869986279	0.500776718575415	3.85822389139647	0.00011421399912178	0.000888810830967912
CDCA2	33.9251085139747	1.93216739499974	0.186682278079378	10.3500311592415	4.18349631196301e-25	3.3665735775906e-22
EN1	8.54072774966362	1.93509694723972	0.381661458951629	5.07019218695846	3.97414184881671e-07	7.20883271428802e-06
DPP10	12.8435743471672	1.93756076071251	0.489285904574257	3.95997665699862	7.49570899513523e-05	0.000625077871172275
TMEM59L	17.6481438096899	1.94174629746589	0.266437277538393	7.28781766352529	3.15015903732362e-13	2.59397281845476e-11
SLC6A3	4.20023880549397	1.94190486253075	0.377674493892936	5.14174214550279	2.72202534416578e-07	5.14308822765325e-06
MYO18B	1.30174764372331	1.9431807983842	0.393865893488073	4.93361022244249	8.07234537955248e-07	1.32572173097956e-05
FAM25A	0.641517884665933	1.94461914792149	0.808480304795262	2.40527708144225	0.0161602078374538	0.0487892768680561
APCS	5.66445791551216	1.94832798341097	0.603234085217439	3.22980420230843	0.00123875020744741	0.00635124056549349
B4GALNT1	28.031005473749	1.95457697618181	0.226851342779616	8.6161137608106	6.92649407585486e-18	1.55223609011309e-15
MUC15	1.69485175092709	1.95543614163725	0.441875058004822	4.42531459111211	9.6301838446734e-06	0.000110781530075437
FCRL3	9.08421554141905	1.95582688162561	0.243481392349328	8.03275709389547	9.53062448071161e-16	1.36072722424612e-13
KRT39	1.08694269336071	1.95792195309306	0.541861482587452	3.61332557491217	0.00030229473685977	0.00199088032282508
SHOX2	5.65734616449075	1.9600741541921	0.354365840238873	5.53121641993155	3.18017664853432e-08	7.75507539747266e-07
DMRT2	3.07258764080408	1.96500905992323	0.404169054188737	4.86184936614572	1.16294107704099e-06	1.84156608478834e-05
NPTX2	40.7296323069647	1.97176905706341	0.234260043747838	8.41700968512522	3.86215759207932e-17	7.51380637474421e-15
EYA4	8.69922896644404	1.97262159366183	0.279794394086807	7.05025417003109	1.78591267551603e-12	1.24971533625833e-10
C7orf52	4.31046211434321	1.97390035848616	0.315914946597649	6.24820186491565	4.15204841197352e-10	1.68210217587138e-08
CAPN8	3.27635829802447	1.97524802847069	0.35249654984157	5.60359535251754	2.09950530911162e-08	5.33955409995137e-07
MDGA2	2.81307221131962	1.97823035752023	0.395739499287906	4.99881957974845	5.76823428909878e-07	9.88584896942931e-06
GDF10	3.20601263249005	1.98096330597389	0.348776093058942	5.67975656989517	1.34886575101214e-08	3.61460149382146e-07
SLC7A14	0.696182556540675	1.98280398056367	0.544770209690728	3.63970706417542	0.000272948375363952	0.00183806695984914
COL10A1	14.9553901481401	1.98578986802824	0.2884581252056	6.88415300006843	5.8132369533624e-12	3.64955840504709e-10
EBF3	14.087619264207	1.98851930810874	0.211370155962049	9.40775815326442	5.06831373804289e-21	2.03930514587071e-18
TSPAN8	131.332271761305	1.99019206434137	0.314143520616163	6.33529560131559	2.36886664887933e-10	1.00331136726698e-08
DOC2B	8.43976367497412	1.99607025144983	0.319531530899495	6.24686473297582	4.18773422539163e-10	1.69028653553231e-08
GUCY2E	1.57567334481099	1.99749372852907	0.488517874896986	4.08888565019301	4.3345044877142e-05	0.000393528551028165
CXCL10	95.2591187246574	1.99784662842275	0.190961831367921	10.4620206777006	1.29073212046616e-25	1.08814864098728e-22
GABRD	19.3458099143329	1.99874499394081	0.221636790177052	9.0181101808239	1.91361807496506e-19	5.84115420675543e-17
FAM178B	1.52467600072145	2.00156741427621	0.303411451870554	6.59687497599842	4.19914578968703e-11	2.14241144266914e-09
IFNG	1.55454154281414	2.00265633331527	0.304819715910367	6.56996981751717	5.03254619540866e-11	2.48872061015405e-09
PLAC1	0.912122169645161	2.00794319316861	0.485441156107281	4.13632665443979	3.52909723059118e-05	0.000330227998786397
VGF	111.300662007553	2.00922407441363	0.33677228844219	5.96612056089209	2.42960795187881e-09	7.99512624164729e-08
DMRT3	0.802426406713193	2.01217764431582	0.559781203727229	3.59457879421103	0.000324916803648129	0.00210707952080091
C10orf99	42.7189146633745	2.01522752785664	0.30933436474815	6.51472244119198	7.28241898894223e-11	3.45651329169526e-09
RIMBP2	7.44462381573312	2.01684686595257	0.368658376164189	5.47077456082085	4.48072964629081e-08	1.0534772597335e-06
PHEX	7.8789594652161	2.01740861667579	0.272349934318144	7.40741363395803	1.28786300114007e-13	1.14574505387859e-11
PDX1	0.916520887511467	2.01823801048902	0.631339688866115	3.19675453021776	0.0013898314574823	0.00693378340459809
NXF3	1.88002602721656	2.01952815989022	0.460148424011123	4.38886249416211	1.13945083101607e-05	0.000127514775678309
UGT3A1	737.986880082351	2.02001214639752	0.312176699323067	6.47073324427406	9.75284787852651e-11	4.48479009977749e-09
SYTL5	8.77135595756608	2.02152362403825	0.307334590387598	6.57759877106179	4.78106260214346e-11	2.39784510788521e-09
TMPRSS15	0.52454108891068	2.02708702262607	0.786054292730889	2.57881299214539	0.00991404411590989	0.0332609886352224
A2ML1	2.33723465057827	2.02861199096377	0.481015620158668	4.21735159098287	2.47188401689691e-05	0.000246825914467811
HTR6	1.1580127673237	2.03470966298584	0.4866627096438	4.18094426111895	2.90301026509115e-05	0.000280539812954005
KNG1	20.0428579408422	2.04446513785025	0.454661645724926	4.49667386082345	6.90247407226888e-06	8.31302047452028e-05
PPP2R2C	149.870350765348	2.04553605598464	0.37054616945895	5.52032708628835	3.38369217886264e-08	8.19492289118799e-07
CR2	13.6057670581164	2.04854337242155	0.306662655522341	6.68012011091553	2.38746492811781e-11	1.29258957453816e-09
CEACAM7	0.813601118656703	2.05485743929884	0.639940289145899	3.21101433079229	0.00132267338512348	0.00666759954733091
FABP1	17.6580300669464	2.05603810974828	0.412512643441931	4.98418204250195	6.22244757753211e-07	1.05217012332978e-05
WBSCR17	12.585325131274	2.05763777814902	0.325076112842273	6.32971078729304	2.45621141977742e-10	1.03782260085297e-08
ISL1	0.587517521359688	2.06569755934963	0.771993109260154	2.67579792432255	0.00745515801930459	0.0265799119185018
TRPM5	0.70109227469603	2.06662896030567	0.496699704105445	4.16072114242079	3.17244258126122e-05	0.000301439337143036
MS4A8B	2.4829699011975	2.07107980044171	0.608065855865367	3.4060123265666	0.000659192028471309	0.00375964624762105
TLE6	13.2622226607868	2.07318571487703	0.243170319727121	8.52565279020691	1.51950420428357e-17	3.16485910972192e-15
C9orf57	0.751022670659888	2.07559832199723	0.609764678607377	3.4039333448071	0.000664229599682812	0.00378362961157802
MS4A10	0.859522425457832	2.07925440223598	0.80220601540733	2.59192073145975	0.00954417597893383	0.0323202164366956
PANX2	96.3705657051279	2.08239966990243	0.267143976945875	7.79504630315636	6.43848649706026e-15	7.65013187543321e-13
TGM5	1.87810270205725	2.08539576163741	0.391383205915676	5.32827093783556	9.91521415441586e-08	2.09974822236577e-06
CYP26A1	1.51525840605361	2.08656427651361	0.323708154704916	6.44581931652501	1.14977574375163e-10	5.1927626957599e-09
ZP1	2.06529969947595	2.08935573272851	0.444350222795172	4.7020472265896	2.575659048493e-06	3.57923609062166e-05
RIMS1	3.14112904078976	2.09058733489732	0.406741353485469	5.139844564568	2.74965832000987e-07	5.18423332241265e-06
C2CD4A	166.240400444477	2.09311315323184	0.263261115491062	7.95071140425562	1.85443492804703e-15	2.58511149339721e-13
C20orf141	1.08751742964325	2.09688248293127	0.477649229170808	4.39000495525017	1.13348077877129e-05	0.000127168211073301
KIR2DL4	1.70572538273667	2.09735251334543	0.325373475785735	6.44598490482542	1.14852093656556e-10	5.1927626957599e-09
CAPN14	4.64525664429296	2.09795895034357	0.254551733392753	8.2417782915137	1.696697514736e-16	2.83380498121567e-14
GLRA2	2.71501968216352	2.10248119377131	0.436991032431179	4.81126851064712	1.49975370259423e-06	2.26511584560531e-05
SYT1	18.7033980428855	2.10719162899568	0.259329567756526	8.12553557708483	4.45391322174933e-16	6.97806014848231e-14
ERBB4	42.6776059949805	2.10790347008257	0.317534795441656	6.63833853909054	3.17238587885324e-11	1.67653491340948e-09
GLB1L3	2.13015853587937	2.11453192682343	0.670184048251827	3.1551510847493	0.0016041501166613	0.00780430713530409
IGFL2	1.34638863653274	2.11730189370032	0.394575104485598	5.36603011601711	8.04885081494464e-08	1.74201534019291e-06
PMCH	1.05378650943996	2.1173199262691	0.386043641130681	5.48466468730762	4.14254410780611e-08	9.81788499124489e-07
C1QL1	56.2649760172909	2.12269373927099	0.26042587323282	8.15085579985096	3.61357804245296e-16	5.81588960578065e-14
STYK1	20.2823081755504	2.12310448599243	0.286776579296065	7.4033398794417	1.32801268997732e-13	1.17555683316792e-11
SLC14A2	1.54302646922553	2.12896412584498	0.329527039271157	6.46066596098999	1.04243197946846e-10	4.76878960323247e-09
PRSS22	30.7855910441481	2.13489595028067	0.352672427817548	6.05348130981517	1.4174852559851e-09	4.93999192361421e-08
KIF1A	35.3478250226886	2.13889324323014	0.345949378542086	6.18267693453867	6.30236094793176e-10	2.40078323797232e-08
ZNF536	1.61551778829585	2.14036978383456	0.432410744843954	4.94985337287806	7.42694137685404e-07	1.23230150080435e-05
SIX1	16.2473032603188	2.14666945006815	0.246473647001399	8.70952929931679	3.05139228193388e-18	7.40025328210376e-16
SLC6A17	77.3993849035526	2.15024083815	0.282469173516078	7.61230265017789	2.69255142498586e-14	2.90664209926523e-12
KCNK9	4.03530368117563	2.15113772292636	0.328704637130749	6.54428772804537	5.97796070962406e-11	2.90752242865891e-09
PGC	3.65546899905627	2.1517922996702	0.391878405449148	5.49096931535165	3.99733804358175e-08	9.51194525854453e-07
UGT3A2	61.4086941402003	2.15276981575842	0.375809857826197	5.72834844783138	1.01413094963786e-08	2.81855170053197e-07
WSCD2	7.79061848735399	2.15398256897012	0.280449705602867	7.68045936914008	1.58519119791986e-14	1.77621677012489e-12
CP	235.076380010725	2.15401082474722	0.267365502761892	8.05642763369334	7.85564665536754e-16	1.16571777917486e-13
LOC100188947	2.34381278450786	2.15758387483708	0.324166834280808	6.65578229069566	2.8179712362904e-11	1.50723150354336e-09
KCNQ2	0.986066150240339	2.15793440347089	0.591649632743435	3.64731808158945	0.000264991801588478	0.00179061635699328
LOC389493	3.03266944000937	2.15803983550451	0.533717905482524	4.04340909933211	5.26795855068745e-05	0.000464924916158378
RYR2	20.8627994958455	2.16176980916387	0.226064375816353	9.56262923495746	1.14802407117935e-21	5.0811545390398e-19
B4GALNT4	61.9145008001025	2.16256694564123	0.330260764162773	6.54805892889955	5.82897202996794e-11	2.85072156957327e-09
GABRA5	1.56707329076922	2.1628314145796	0.465605092845593	4.64520566422767	3.39737831443638e-06	4.54627253807874e-05
CRABP2	84.9328009091979	2.16391114051568	0.213392896671224	10.1405022110443	3.65217109658049e-24	2.69408487891088e-21
CLCA2	4.95232397420047	2.16507503487259	0.40715296173877	5.31759618209952	1.0514710573021e-07	2.21610042839004e-06
NKX2-5	0.893524430312668	2.16510937122579	0.703267891987646	3.07864100706566	0.00207947095290573	0.00958473151529369
ARL14	18.3066106677083	2.16852600903889	0.376575256207528	5.7585461957273	8.48414498114923e-09	2.41096794135258e-07
SPRR1A	1.41530745605572	2.16958217663273	0.66377882831414	3.26853175197379	0.00108107046833094	0.00566585896131763
C21orf99	1.08865400520382	2.17052334844106	0.473416115695297	4.58481085979351	4.54397580034657e-06	5.82945996879245e-05
MS4A15	0.65298444943616	2.17194481671906	0.758417892944114	2.86378372256983	0.00418613728788637	0.016763486664723
CHP2	1.32306532137443	2.1746930120309	0.450982870971895	4.82211886971295	1.42041252748717e-06	2.17534458361876e-05
COL11A1	21.114374838889	2.17557983371507	0.310688804824306	7.0024403838605	2.51541933484617e-12	1.73280093012127e-10
BRS3	1.28190902165577	2.17558121096034	0.484453190984406	4.49079756609626	7.09569667461464e-06	8.51099010348087e-05
HOXD13	1.05918595287791	2.17774059427055	0.38334932504594	5.68082542993801	1.3404623991472e-08	3.6011451160094e-07
PAX5	2.17363780035677	2.18003097055181	0.387271259941867	5.62920928054162	1.81037630704196e-08	4.69954576830951e-07
SLC7A11	190.71571754539	2.18138091846081	0.257219499105135	8.4806203497395	2.23996401443242e-17	4.61120033854785e-15
GJB5	13.8854232061338	2.1873305634207	0.264032300641528	8.28432944797311	1.18776393863887e-16	2.08199730392699e-14
GPR115	17.0986212598454	2.1915398794601	0.317250328283103	6.90791997385879	4.91811266874297e-12	3.16619151590639e-10
GRM4	1.12319261406296	2.20056919056555	0.409774714521471	5.3701927243982	7.865254160399e-08	1.71064446751479e-06
MCCD1	52.474308760734	2.20405028291426	0.393558753980106	5.60030811314561	2.13971144339096e-08	5.41937788180165e-07
CLDN11	52.2154329385969	2.20807412841038	0.229424282830509	9.62441334094365	6.30657609759731e-22	3.017611438699e-19
EGFL6	4.47938081561076	2.21156497513963	0.40467032025217	5.46510298497181	4.62638131167154e-08	1.08054689633025e-06
CYP4Z2P	0.577630343182096	2.21304483924921	0.848872061124005	2.60704167400548	0.00913282442203414	0.0313044576123315
RASD1	263.355384743243	2.21480828371314	0.254632112805597	8.6980713442223	3.37572290989884e-18	8.07618897254718e-16
OPRK1	0.91183934854785	2.21578311475394	0.803732762898144	2.75686548693641	0.00583583530160072	0.0218245940387704
DMRT1	0.717536584255663	2.22502987877281	0.584899745272779	3.80412181191005	0.000142308143871394	0.00107392300899367
STMN2	3.22160786818777	2.2270079078193	0.427226092545229	5.2127151095846	1.86096579138221e-07	3.69770352083397e-06
GABRG2	0.666571883104659	2.24308743840897	0.867618635911645	2.58533801092465	0.00972835741251911	0.0327818565741286
PRIMA1	18.948079151913	2.24324160962417	0.271426246515796	8.26464514180144	1.40110898514124e-16	2.38511860316735e-14
KCNG1	10.7900283661215	2.24855345599356	0.304958169247036	7.37331766368286	1.6643326856676e-13	1.43733394473459e-11
KCNK3	245.50566504483	2.25731376293688	0.251167816831786	8.98727309657139	2.53440291898889e-19	7.60492699623377e-17
TFAP2B	2.68076562643063	2.26166871290326	0.431857316425243	5.23707397532251	1.63142315557198e-07	3.30088177671386e-06
IVL	2.73450845390244	2.26584278947184	0.568560879489352	3.98522457525901	6.74163344889297e-05	0.000573265507104712
HTR2C	1.03841504806727	2.26718163165459	0.601415055689255	3.76974538666358	0.000163414171436981	0.00120998933129247
S100A7	2.17597671653899	2.26744574064684	0.850567404610721	2.66580370744936	0.00768045232332931	0.0272432120756163
EPHA5	1.96096526213896	2.26772909194166	0.760918702217404	2.98025148459781	0.00288011827251755	0.012448636205237
IGFL1	0.518021127040952	2.27716243583402	0.906211405572175	2.5128379777964	0.0119764324639363	0.0386705745652978
SCNN1B	10.4553732287209	2.27755773435242	0.34234077110796	6.65289654802514	2.87380202159329e-11	1.53246358404481e-09
MAT1A	62.0390424261449	2.28081842896692	0.380235078982798	5.99844295026262	1.992184844207e-09	6.71802675844586e-08
CSAG3	0.48063212081176	2.28389448213703	0.843767131832196	2.70678294516839	0.00679386606481739	0.0245266323025137
SYT7	24.4216736553587	2.28739710233341	0.22741437345914	10.0582784963871	8.44623146695883e-24	5.34043149610854e-21
UGT1A7	2.46808193800408	2.28942110458252	0.666567755423998	3.4346412438241	0.000593338771318252	0.00345655465857793
XK	30.6827169414447	2.29394179694599	0.246778922515582	9.29553372533728	1.46469475654861e-20	5.4022824937368e-18
PRSS1	0.774268260859888	2.29607050783883	0.680193369000222	3.37561436568206	0.000736510741071767	0.00412501934828679
PVRL4	24.0709105825721	2.29952426505224	0.250320982355	9.18630249617313	4.06576662518594e-20	1.41137906533906e-17
SRPX2	80.8073739471234	2.3015505810612	0.244833393980741	9.40047655934652	5.43164933597894e-21	2.13693155209269e-18
PAGE5	0.914219526559214	2.3099983658296	0.57127916522052	4.04355437142175	5.26469402317632e-05	0.000464868543572636
TEX19	1.48782601192308	2.31136147363312	0.362630041233106	6.37388305109375	1.84301151020422e-10	8.03661964942256e-09
SMPX	1.17947465795177	2.31333042730642	0.636760316387945	3.63296890175082	0.000280178796888738	0.00187605348718541
ACTL8	1.52563052307478	2.31550731298267	0.62123312070901	3.72727601892828	0.000193560444064538	0.00139243970000755
AQP2	36.5361408093602	2.31562364824262	0.451553065622252	5.12813182887294	2.92631507484594e-07	5.47647802167786e-06
EPHX4	8.46616267022414	2.31782687110767	0.277675483823407	8.34725067979618	6.98703180855793e-17	1.28852511602822e-14
CYP4B1	9.33806426883953	2.32211607851443	0.275273560459599	8.43566695848814	3.29319332643453e-17	6.47807718346633e-15
AKR1B10	6086.45012641772	2.32728402772647	0.398664576625926	5.83769957045921	5.29264806029022e-09	1.57216512180165e-07
LMO1	2.81652781003026	2.33860038638118	0.348872075965605	6.70331777029853	2.03739733218799e-11	1.1236032211436e-09
SBSN	3.52187234041136	2.34416567069427	0.40242833070609	5.82505129939846	5.70950591004483e-09	1.67908791746567e-07
?|729884	0.721924944504598	2.34441423604553	0.822111424772991	2.85169888825337	0.00434862723821769	0.0172890403380656
TCN1	27.1162787582059	2.35284869684761	0.316979024018213	7.42272680072488	1.14733284395932e-13	1.04702993141525e-11
SLC35F1	17.504054403925	2.36457687165209	0.23477327894519	10.0717461641115	7.365855879436e-24	5.0155812495975e-21
HS6ST2	60.8313992201984	2.36806183104461	0.312127830097419	7.58683335063555	3.27818265009309e-14	3.45458009745524e-12
ANGPTL3	47.7170833756087	2.37026332210816	0.350109483488952	6.7700631770603	1.28726172105564e-11	7.35892276839342e-10
LRRTM1	2.38372787415549	2.37122312298472	0.570693652798311	4.15498422202135	3.25309989902901e-05	0.000307490019286757
NXPH4	77.3023877843325	2.37554933592836	0.264914747810652	8.96722192917054	3.0408699689134e-19	8.97259365494048e-17
NCCRP1	11.8149341041302	2.37565358764701	0.274631883728992	8.65031967661599	5.13553681864657e-18	1.18077329658856e-15
IGF2BP3	72.4453138809174	2.38157377948734	0.226881643216991	10.4969875293507	8.91808198680073e-26	7.894286174716e-23
PLA2G4F	21.1998728998015	2.39371615961474	0.303145288684811	7.89626706718692	2.87380569358747e-15	3.76873007402019e-13
CHST8	1.55358084739696	2.39575079867193	0.367973654795481	6.51065848723188	7.48220782924582e-11	3.54184511788684e-09
LHX1	21.4777692979422	2.39698430846233	0.43186064625793	5.5503652144093	2.85073428045471e-08	7.08839883443403e-07
ZFR2	10.4199498774352	2.40173474804918	0.31255656330059	7.68416034104971	1.54003686830074e-14	1.7366122749297e-12
CHGA	11.2193595720004	2.40489564248061	0.429186897506725	5.60337618984029	2.10216290536947e-08	5.33955409995137e-07
HHIPL2	4.02100839105835	2.40835906900687	0.359455590669436	6.70001839315291	2.0839330785394e-11	1.14222759202667e-09
MSMB	1.07407163068521	2.42148350890948	0.69095604585483	3.50454059044189	0.000457395835536515	0.00278751665140738
SLC22A8	90.6977809109972	2.42352228542833	0.44230703255641	5.47927594870255	4.27069861082778e-08	1.00811264274793e-06
SLC5A7	1.69138121887796	2.42544508711918	0.483228140715913	5.01925463928039	5.18723527046481e-07	9.0656281567926e-06
GJB6	1.85644424885135	2.42851963997415	0.432061253720103	5.62077626508808	1.90101332787364e-08	4.89179359835392e-07
ADH1C	11.2212202723593	2.43042906440726	0.280258944230959	8.67208385115575	4.24283024146149e-18	9.88356139405713e-16
GABRA3	0.791906095935185	2.4439516932768	0.849513935528	2.87688240423956	0.0040162523592915	0.0162396551607204
LOC84740	18.9716448210472	2.46379476221269	0.287317697659764	8.57515837792305	9.89505366008966e-18	2.13636621949058e-15
CXCL11	19.3502094977732	2.46808200037823	0.211646783345037	11.6613253524134	2.0089075354071e-31	2.73582300052671e-28
NKX3-2	2.16706224817139	2.47404374677713	0.345299247972342	7.16492654213744	7.78282752785633e-13	5.88834096381062e-11
CCL21	159.878308942734	2.47613459607378	0.32672908103828	7.57855587327923	3.49422418944602e-14	3.66045828697942e-12
VWA5B1	3.01750498898574	2.48393798726404	0.445276837346407	5.5784127511929	2.42723166285414e-08	6.10393598851842e-07
CXCL9	257.349344514589	2.50497244073731	0.209229300162992	11.9723788149456	4.95862460483948e-33	7.98068090946165e-30
TSPAN5	16.3568091865231	2.52148856633088	0.286839198136998	8.7905996903763	1.48763740271647e-18	3.87310773201359e-16
C10orf81	4.29630389748597	2.53345214664725	0.373036627173337	6.79143001545007	1.11027441330417e-11	6.50870801759503e-10
PYDC1	1.20990847528032	2.53950349178501	0.647989791881153	3.91904860786877	8.88991864766863e-05	0.000720307184157096
SERPINB3	4.47630333746914	2.54707819835341	0.727650731046227	3.50041316483141	0.000464537555643244	0.00282811997424622
MGAT5B	7.87772632313353	2.55990566081639	0.26723384970759	9.57927172630812	9.77316229437978e-22	4.43651449383845e-19
CDH20	2.09615940276357	2.56144292259514	0.394470327748847	6.49337286586983	8.39356016322709e-11	3.9521167321748e-09
GPR158	2.89082524128811	2.56657313912895	0.325549488257648	7.88381868718436	3.1752492213757e-15	4.07352262429242e-13
CDH3	90.6136906696574	2.58141826365888	0.261682973404935	9.86467797300793	5.92241802414155e-23	3.08383790292359e-20
DNAH11	33.7181519348143	2.58708248933931	0.375479833396241	6.89007040921205	5.57647803559333e-12	3.52592739793373e-10
SLCO1B3	0.680587062149913	2.60381148668244	1.06327657589278	2.44885624842827	0.0143310631095204	0.0443794195016527
GATA4	2.34104572598267	2.60746838310963	0.458150432217757	5.69129307700906	1.26080883516311e-08	3.41305192931616e-07
FOXF2	15.2251047753618	2.62944985182866	0.249390977439361	10.5434842865075	5.44436308392669e-26	5.07300021251779e-23
RTL1	0.723138036951006	2.64886656465002	1.00969871248237	2.623422741758	0.00870511855778378	0.0301124304312239
PRSS33	1.1064434440296	2.65244724313589	0.572025825717444	4.63693617295888	3.53611545740107e-06	4.70348520344316e-05
SLC30A3	3.00639887243478	2.66102182411724	0.351339617186001	7.57393044778233	3.62098328222108e-14	3.77093458990835e-12
OLFM4	15.5677791102667	2.66509761360355	0.397262395168258	6.70865817157138	1.96422185289459e-11	1.09354036741025e-09
GAD1	25.7998910265398	2.66668712380674	0.288247951796333	9.25136538590547	2.2164299970002e-20	7.84793533337829e-18
LOC144776	1.82743187452505	2.6792924457005	0.526110888170447	5.09263827444772	3.53115005892511e-07	6.49174253823574e-06
GPR64	45.8482964690689	2.67954077217784	0.293704804510922	9.12324460146241	7.29081781362136e-20	2.43540827495005e-17
DKK4	0.805954100551474	2.68030811744823	0.927947547992916	2.88842631595454	0.00387174728729814	0.0157669044732804
CYP1A1	1.93118731303223	2.69269599440196	0.516468505906176	5.21366930143681	1.85141400415883e-07	3.68320931989535e-06
CNGB3	0.911418473270329	2.69505144583766	0.635782185080982	4.23895401456457	2.24563647901393e-05	0.000228355819784391
JPH3	8.96698521507009	2.71784823106627	0.271135649753902	10.0239427516564	1.19633068041662e-23	7.05994612203196e-21
AVPR2	15.5087262036322	2.71787440726656	0.263701538217881	10.3066308434687	6.57665926953991e-25	5.0623119873015e-22
KLK11	1.73150961289591	2.71792956892167	0.503328606434368	5.39991078229342	6.66740468683887e-08	1.47181711441141e-06
MYO3B	10.603785010638	2.7193077736249	0.350453883078883	7.75938833872993	8.53399642236786e-15	9.93986004352635e-13
ADAM23	16.1546871022943	2.72116155168012	0.298074697150717	9.12912628173941	6.90543342807012e-20	2.35103448866449e-17
FAM83B	18.0556290096193	2.73045247589005	0.400866852760577	6.81137005239206	9.66735991039699e-12	5.74332012931773e-10
ANKRD30B	1.20885360387756	2.73952162025295	0.772867277294602	3.54462105038598	0.000393177917050101	0.00247012840434882
PREX2	28.4585382393021	2.74062759080685	0.255547838227663	10.7245187821361	7.80924946970176e-27	7.68083070064444e-24
KLK8	0.831632630825737	2.75152848372143	0.797404670763382	3.45060492445736	0.000559331700098656	0.00329311886217047
FSTL5	1.15053562899011	2.76062625730893	0.501718732828667	5.5023384152803	3.74786671238599e-08	8.97865118756179e-07
FIBCD1	24.4709092319839	2.76096058060586	0.312823508367298	8.82593701162674	1.08547111187012e-18	2.91169402493161e-16
ADAM7	14.0355989074374	2.78090955361819	0.575106831624766	4.83546603986897	1.32834052029354e-06	2.06108155751769e-05
COMP	46.6353295401773	2.78121306455611	0.385801204746709	7.20892788912381	5.63941143375736e-13	4.35983144206289e-11
ANKRD34B	18.542882992536	2.80286565698557	0.409287032113933	6.84816629178062	7.48025852071435e-12	4.61430302615773e-10
FOXI1	3.7824392472929	2.80371905647861	0.598468455777686	4.68482345127996	2.80201351097351e-06	3.85445588176185e-05
HOXD10	53.0655698737151	2.80442211245552	0.227190345344908	12.3439317291322	5.25268061406237e-35	1.162418219892e-31
BARX1	1.28624360868525	2.81946633833676	0.497651704016618	5.66554141296101	1.46561020412028e-08	3.88430584636908e-07
SLC6A14	1.97335396347272	2.82728603237076	0.646245524480509	4.37494098646719	1.21465334161697e-05	0.000134233600249606
KCNK12	2.95693460864233	2.84500062748915	0.376733550791025	7.55175805689597	4.29421666769359e-14	4.39449779681198e-12
OTX1	3.38818367808164	2.85938419838627	0.422104179216363	6.77411961116972	1.25166089676576e-11	7.19461185595487e-10
LRFN2	1.34464907385772	2.88989729667341	0.519415453235487	5.56374916970985	2.64039397756171e-08	6.6305723374117e-07
PSG5	2.37068979343506	2.91200808253	0.538384645069892	5.40878739614123	6.3452900113464e-08	1.40773200953479e-06
GRHL2	22.4650352237463	2.93272850746878	0.369059166855235	7.94649956119138	1.91855559804623e-15	2.65360221154769e-13
C13orf36	1.55492762906295	2.93756834110685	0.520055632600628	5.64856557060451	1.61792140588285e-08	4.24980423883532e-07
MMP13	1.17473829632206	2.94070793205946	0.684386588837123	4.29685207165759	1.73240720568243e-05	0.000183107684593443
SERPINB4	1.79905790557892	2.96356180375585	0.798678436198859	3.71058196820774	0.000206783327081251	0.00146905779399939
FABP7	6.71412969244155	2.9831758528546	0.484302732857892	6.15973367577497	7.28673846780677e-10	2.73894730008601e-08
RHBG	29.9608230122223	2.99991808605749	0.298111061555541	10.0630888045681	8.04343519921104e-24	5.27411025062342e-21
TMEM155	2.23514485563238	3.00999926478773	0.420483451185563	7.15842503742054	8.16091932367860e-13	6.12207269942398e-11
FOXA1	7.14154698515595	3.01088169825517	0.339104061568054	8.87893139448853	6.75057255605749e-19	1.8673771333194e-16
CLDN8	14.8185437287453	3.01224383344416	0.556295883403289	5.41482316032244	6.13493079648943e-08	1.36619892856665e-06
SUCNR1	34.4007522019847	3.01434608892195	0.298029251351871	10.11426252708	4.77600234064283e-24	3.38217381754962e-21
SPINK1	13.4589064006675	3.02516096766989	0.446853455157647	6.76991736944862	1.28855968041231e-11	7.35892276839342e-10
IRX1	4.1758300460104	3.03233677324491	0.457310401501603	6.63080647911805	3.33857704647926e-11	1.74354477967165e-09
NPHS2	6.98777465618647	3.03258404595437	0.556768369848576	5.44676064622554	5.12954151431613e-08	1.17329977996709e-06
MAGEA12	0.842399610919191	3.03364731928918	0.992738685287205	3.05583671136128	0.00224433446236433	0.0101829055155556
L1CAM	1638.41623516814	3.0595309806688	0.305615810681831	10.0110363198912	1.36317025426936e-23	7.54173943174523e-21
ALDH3B2	16.2952548384857	3.06360451335635	0.250331148885167	12.2382073785061	1.94276124226696e-34	3.82162722589936e-31
UGT1A10	15.2283863288475	3.07360719599512	0.640843692317232	4.79618857584638	1.61713052302153e-06	2.41147789261018e-05
C20orf151	1.92620282022489	3.08033392108594	0.68899165674667	4.47078551811625	7.79328252506036e-06	9.2598841492395e-05
DUSP13	1.83003224214747	3.10614711346712	0.444891032410747	6.98181551701711	2.91389612657069e-12	1.98413911633875e-10
MMP10	1.47743297370956	3.10925761125467	0.612298502958274	5.07800949411525	3.8140964079497e-07	6.96849977361625e-06
INA	14.1742356656062	3.13491735343493	0.320247202429236	9.78905461048529	1.25463449895599e-22	6.34629976271909e-20
KRT13	14.5793252485223	3.13854547597406	0.38595683604993	8.13185616323177	4.22766287165409e-16	6.71974483571386e-14
CCL19	48.3396084461751	3.15924572927644	0.333609310859935	9.46989675178112	2.80120436780786e-21	1.15331446808536e-18
C6orf223	19.6120051610386	3.16513141697559	0.285163506005045	11.0993565106455	1.26350291811577e-28	1.3980659788951e-25
AKR1B15	37.6805031849502	3.17124624026824	0.509439357684379	6.22497298733047	4.81638986330698e-10	1.91186919596383e-08
TMPRSS4	84.4286925814423	3.18250489813221	0.359651176051103	8.84886553986968	8.84134172072155e-19	2.40810944344084e-16
SLC9A4	4.73703596416334	3.21853512203603	0.430804332791932	7.47099060303673	7.95933393768008e-14	7.53540363811166e-12
UPK2	6.77671336017649	3.23345142813888	0.292802284928685	11.0431222520221	2.36663834595593e-28	2.46464501628257e-25
HMGCS2	84.3866366851726	3.29088539121496	0.381384787687543	8.62877990275556	6.20098881367957e-18	1.40746546099209e-15
HAPLN1	14.3292593168689	3.29460375762191	0.395404974711713	8.33222637126401	7.93360662361791e-17	1.44800589344878e-14
GPR87	16.0814404844961	3.29939899270472	0.479273634063285	6.88416544997979	5.81272862930694e-12	3.64955840504709e-10
DACH2	1.41976493080154	3.31173476215302	0.551532089700601	6.00460938537736	1.91793076701546e-09	6.50479814161718e-08
TMEM40	3.68982293417208	3.34457595781896	0.551355902275623	6.06609259829236	1.3105958673387e-09	4.60372802288974e-08
PART1	4.26417431617928	3.35077134431374	0.541435414292476	6.18868152297053	6.06695164561387e-10	2.32487688168719e-08
PADI3	10.183715274483	3.36381923453452	0.404112477234092	8.32396776649376	8.50667483163176e-17	1.5367568491756e-14
DHRS2	34.2958527100345	3.41779493959953	0.29880925819424	11.4380490091033	2.69886335982127e-30	3.41290549444827e-27
KRT16	21.6690364737599	3.44498347688178	0.412671073327455	8.34801298066313	6.94209468124426e-17	1.28852511602822e-14
ZIC3	1.83184717128133	3.45111848574531	0.575739499107589	5.99423609305013	2.04444176277792e-09	6.86045416759321e-08
CYP4F8	1.16287414289483	3.48608158233357	1.32910640504585	2.62287621901372	0.0087190943687503	0.0301489934969444
CRP	17.2565944071407	3.49592690085974	0.413223253052324	8.46014079565138	2.67054901305254e-17	5.43441376173359e-15
KLK6	28.0590211199227	3.53122669295415	0.411232968943696	8.58692507564399	8.93278463454152e-18	1.95241998975214e-15
PLA2G2A	6.97779775457266	3.55523030432172	0.537449681616276	6.61500122882211	3.71548658919898e-11	1.92900218695539e-09
GATA3	238.532623935581	3.55876770805944	0.264742921044367	13.4423526567611	3.41406970331256e-41	1.20885380054891e-37
HOXD11	32.0909576425708	3.57396343833189	0.281050294011867	12.716455077542	4.79107216611856e-37	1.21173059469947e-33
NXF2	1.56722479132989	3.62626650745775	0.994879295917025	3.6449311211319	0.000267463425335514	0.00180525066036597
NR0B1	21.1988968193709	3.64822036373606	0.419575820701981	8.69502050340346	3.46767162640283e-18	8.1855544631781e-16
KLK1	41.1278499319712	3.67337344585309	0.419358576369683	8.75950475999053	1.96110061356694e-18	4.95990360894131e-16
UPK1A	3.51217263907491	3.67796115250147	0.435565941092836	8.44409722044257	3.0640411763504e-17	6.1642937484213e-15
LOC400696	2.11564813078778	3.69806235859155	0.438266689910111	8.43792705156311	3.23015112861312e-17	6.4254601776367e-15
C4orf7	6.88170799780228	3.70975381573662	0.640645050233708	5.79065398910566	7.01128831119698e-09	2.01833899612084e-07
TFF1	2.79357302887882	3.73016993714465	0.897585074498155	4.15578427396446	3.24173594069602e-05	0.000306743415788788
FAM83A	7.79671767982899	3.7397634104659	0.425726235491563	8.78443257354766	1.57155813261134e-18	4.03229930141322e-16
CPLX2	24.7576977055019	3.76385669295405	0.603844538492639	6.2331551467695	4.57133023763578e-10	1.82688105027322e-08
MAGEA6	1.4708288133494	3.80898612500026	0.958213646458509	3.97509066905696	7.0352448480014e-05	0.000594236520939966
LOC642587	11.637762923464	3.82265366508468	0.581508624747628	6.57368352316991	4.90855057721148e-11	2.44791491320992e-09
MAGEC1	1.51868871114344	3.87971467560019	1.14508118276705	3.3881568695636	0.000703640084593691	0.00397233547756591
BSND	2.36227089575799	3.88704499012023	0.534816227893	7.26800120750619	3.64845531342092e-13	2.96294737930293e-11
TFAP2A	123.200141032039	3.94057217182631	0.305928571168706	12.880693544812	5.78136876882782e-38	1.7058892113888e-34
GPR128	3.39608553512393	4.0084249358857	0.520894141122937	7.69527744590175	1.41187477027919e-14	1.60229685468094e-12
FLJ45983	8.78978280317769	4.01246893306879	0.493466586992255	8.13118666762289	4.25108123361925e-16	6.71974483571386e-14
ANXA8L2	7.9707053099171	4.03505034116632	0.453828568913897	8.8911333872678	6.04887120283371e-19	1.69982882182489e-16
PPP1R1B	21.6696907800843	4.04905065551866	0.338512667151347	11.9612973115371	5.66695805931054e-33	8.36065212350282e-30
FXYD3	20.5943384118242	4.13115009345896	0.411621492934473	10.0362837324353	1.05577025975064e-23	6.4452954064225e-21
CXCL13	42.5962983250656	4.45053464480085	0.326171778809424	13.6447569469252	2.16935580633617e-42	9.6015687988439e-39
ZIC5	3.82567007638951	4.50584104095562	0.736039331351949	6.12173949003424	9.25592666407586e-10	3.36482393554002e-08
PROM2	253.309411770215	4.63093077428749	0.278958116777369	16.6008102857367	6.87564569340327e-62	1.21726431356011e-57
MAGEA3	2.50878375511111	4.70112345304019	1.13732453235551	4.1334934043001	3.57290554091921e-05	0.000333446071146198
FXYD4	14.8942518586213	4.71003815802946	0.773928863018769	6.0858799601524	1.15853221770616e-09	4.10213087645397e-08
KRT20	40.8000893668597	4.75815639308044	0.534330250986968	8.90489801820426	5.34351489514705e-19	1.52583205973683e-16
PAEP	18.8550450638592	5.02817231940506	0.621230376389137	8.09389320050799	5.77873609709391e-16	8.89623859677831e-14
GPX2	108.370227861504	5.17940548936924	0.323603413372411	16.0054105591545	1.17137973129122e-57	1.03690533813898e-53
PSCA	52.7680841134246	5.21959648915535	0.351973676370061	14.829508112611	9.44223039523526e-50	5.5721748972415e-46
MAGEC2	4.17624816276548	5.41822291571051	1.60971714273596	3.36594720393014	0.000762813069833444	0.00425081604920721
SLITRK6	8.36213903613002	5.62555050045735	0.59275277086921	9.49055116555266	2.29815882041473e-21	9.68728660871961e-19
PLA2G2F	5.86338490573292	5.64026876326541	0.914088332161455	6.17037606193749	6.81277598356129e-10	2.57171398748335e-08
ZIC2	11.1928566856225	5.84231611179829	0.614819113553364	9.50249590978469	2.04918756615585e-21	8.84849187103006e-19
SCNN1G	42.7118378471684	6.27118831445088	0.519288624698527	12.0764985331454	1.40579645310429e-33	2.48882204057583e-30
